# Supplementary material for: Genome-Wide Identification and Characterization of theLRR-RLKGene Family in TwoVerniciaSpecies
Source: Hindawi journal article supplement (doi:10.1155/2015/823427), 2015-01-01
Supplement: f1 [file 823427.f1.pdf]

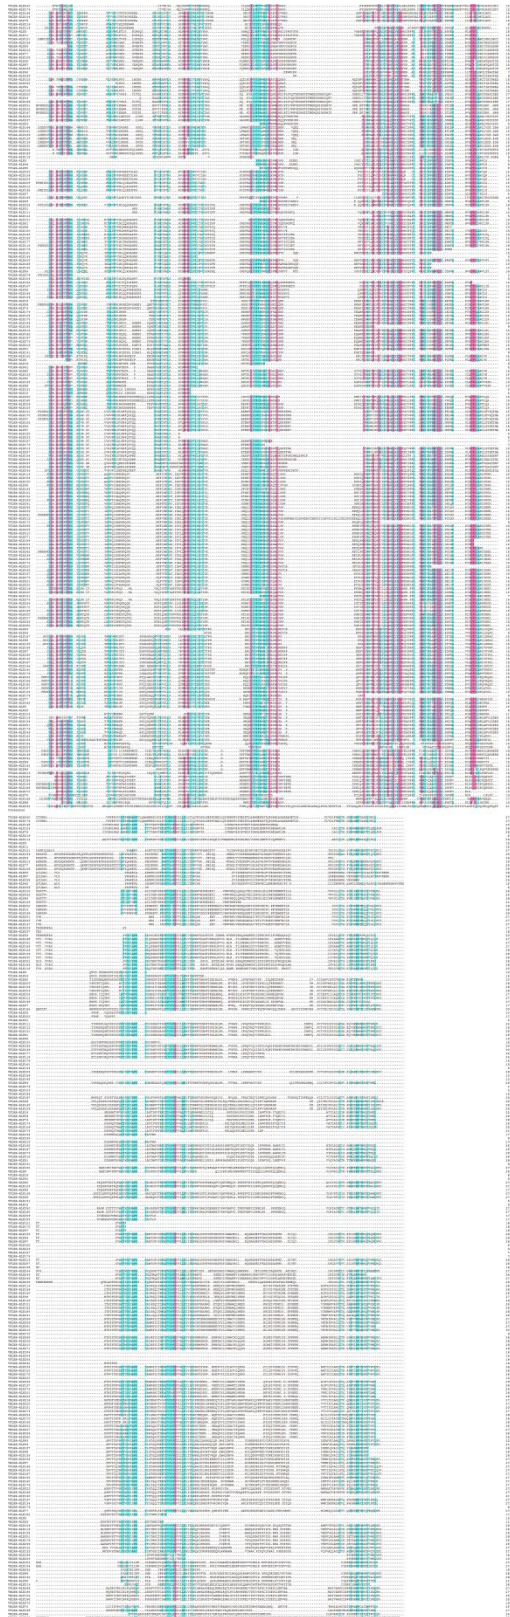

**Supplementary Fig.1 Multiple alignment of RLK domain for *LRR-RLK* family from *V. fordii* and *V. montana***

The multiple alignment was performed using Clustal X v.1.83 with the default settings, and the figure was output by DNAMAN v.5.5.2. Residues highlighted in different color represent different amino acids identity, respectively. Amino acid sequences of RLK domain used were list in supplementary Data Set 1.

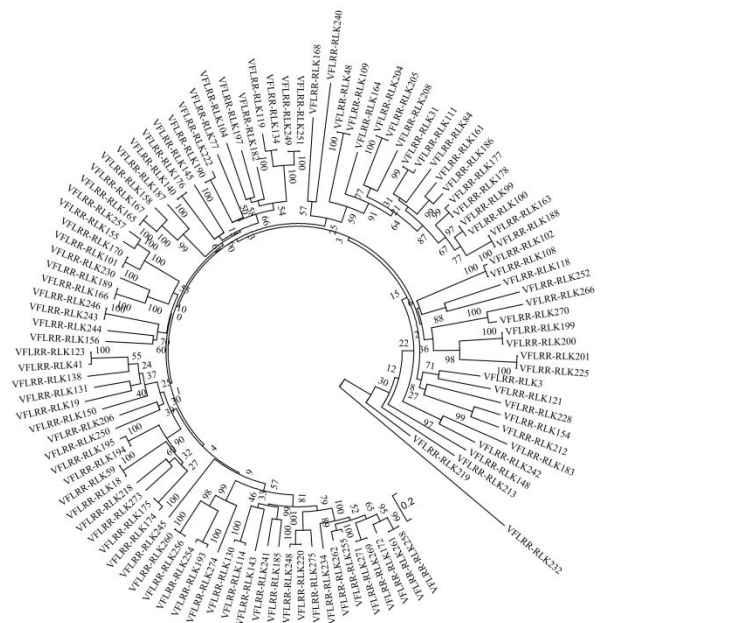

**Supplementary Fig.2 Phylogenetic tree based on the RLK sequences of VFLRR-RLKs**

The phylogenetic tree was constructed by MEGA package v5.1 using neighbor-joining method. The numbers at each branch point represent the bootstrap scores (1,000 replicates). Amino acid sequences of RLK domain used were list in supplementary Data Set 1.

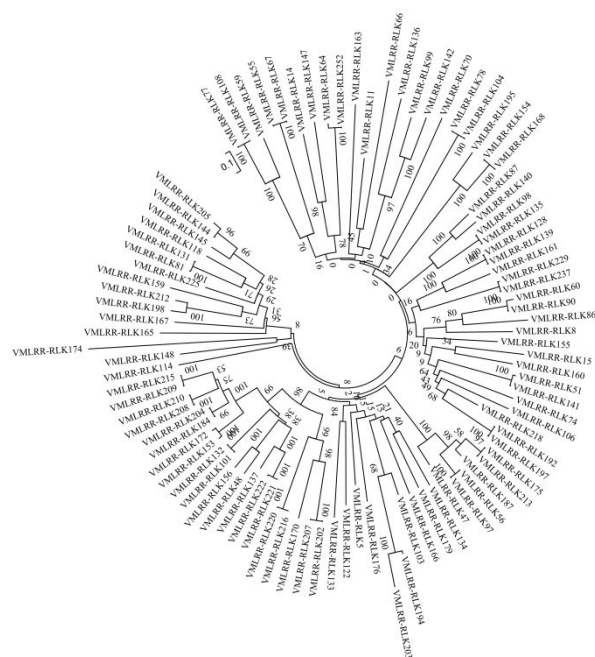

**Supplementary Fig.3 Phylogenetic tree based on the RLK sequences of VmLRR-RLKs**

The phylogenetic tree was constructed by MEGA package v5.1 using neighbor-joining method. The numbers at each branch point represent the bootstrap scores (1,000 replicates). Amino acid sequences of RLK domain used were list in supplementary Data Set 1.

**supplementary Data Set 1    Amino acid sequences of RLK domain from *V. fordii* , *V. Montana*  
and *A. Thaliana***

Amino acid sequences of RLK domain from *V. fordii*

>VFLRR-RLK3

IGGGSIGTVYRTNFEGGISIAVKKLETLGRIRSQDEFEQEIGRLGNLRHPNLVSFQGYWSSSMQ  
LILSEFVPNGNLYDNLHGLDYPGTSTGVGNSELYWSRRFQIALGTARALSYLHHDCRPPILHLNI  
KSTNILLDENYEAKLSDYGL

>VFLRR-RLK18

KTFKSEMYSLTEIRHRNIVKMHGFSYLNGLSYFYVEFARGGSLGELLQEKKKAKILNWDRLK  
VIKGVANALSYLHHDCTPAVVHRDISGSNILLDAEFEAKISDFGTARVLRKSESNTVPVGSYG  
YIAPELASTIKVTEKCDVHSFGVVALEVILGKHPHELLLCLQSGGYDMLFSYILDKRLAPPTGPI  
VQELVLAUTLALLCIRENPKSRPTMHQVSSEL

>VFLRR-RLK19

MPNGELIAVKKLWKTKRDKESVDSFAAEIQILGHIRHRNIVRLLGYCSNKSVKLLLYNYIPN

>VFLRR-RLK31

SKSFIAECKALRNIRHRNLVKILTYCSSIDFKGNDFKALVFDFMENGSLDTWLH

>VFLRR-RLK41

LGRGRSGIVYMTLPSGSTVAVKRFKTMDKFSAAAFSSEIATLARIRHRNIVRLL

>VFLRR-RLK48

IIGASSLSTVYKGQLEDGQMVAVKKLNLQQFPAESDKSFYREVKTLSQLRHKNLVKVLGYAWE  
SRKLKALVLEYMNNGSLESIIHDAHVDQSKWTLSQRIDVWISVASGLEYLHSGYDFPIVHCDLK  
PSNILLDSSWVAHVSDFGTARILGVHLQDGSSLSSSSAFQGTIGYLAPEFAYMRKVTTKVDVFSF  
GHIIMEFLTKRRPTGLTEEHGIPISLSQLFEKALGNGINGLLQVLDPVIAMNASKDEQTLTELFKL  
ALCCTNPNDPRPMNEVLSSLNKLK

>VFLRR-RLK59

FNEKHSIGRGGQGSVYKAILPSGDIFAVKRLHPSEDNVSSEYQMKTFKSEMYSLTEIRHRNIVK  
MHGFSYLNGLSYFYVEFARGGSLGELLQEKKKAKILNWDRLKVIKGVANALSYLHHDCTPA  
VVHRDISGSNILLDAEFEAKISDFGTARVLRKSESNTVPVGSYGYIAPELASTIKVTEKCDVYS  
FGVVALEVILGKHPHELLLCLQSGGYDMLFSYILDKRLAPPTGPIVQELVLAUTLALLCIRENPK  
SRPTMHQVSSEL

>VFLRR-RLK77

VGSGAFGNVYKGIFEVEGTIAIKRAHADSFQSVEEFRNEVKLLSKVKHSNLVSLVGFCENG  
GKRAKVLVYEVVPNGSLLEYIIGRRGRSLTWRQRVNIAIGAAKGIAHLHDGVTSPHHRDIKPSN  
ILVGEDFEAKVSDFGLVKMGPIGDQSHVSSQIKGTPGYLDPAYCSSFHLSPFSDVYSFGVILLQL  
VSARPAVDSSRSQSNYHIIWARPSLERGNVAEILDANLLTEPCNMEIMLKMGLGLRCVVQNP  
KDRPTMTQVWQELEE

>VFLRR-RLK84

NLIGFGSYGSVYKGLLHQSQSFIKVFNLQLRGASKSFIHECKALRNIRHRNLLKIFSVCSAD  
HQGNDFQALIYEFIPRGLDKWLYPEVTKDDYGFSTLNLQRLNIVIDVACALEYLHCDQPPV  
HSDIKPSNVLLDDDMVAHVGDGLARVLSTVSSDAQDDQNSIIKGSIGYIAPEYGMGEGASIQ  
GDVYSFGILIMEIFTTRKPTDGMFQGDNLHNFTVMALPERVMDIVDPQLLFEDNEAGRMQLC  
LISVLRVGLSCSVEIPRDRMEIRNVVREL

>VFLRR-RLK99

IGIGSFGSVYKGILDGGETLIAIKVFNLMMRGAFKSFLAECEALRNIRHRNLVKVLTACSSVDYQ  
GNDFKALVYEFMVNGSLEEWLHPLVETRNLNILQRLNIAIDVACALDYLHHRCEQIVHCDLK  
PSNVLLDKELT

>VFLRR-RLK100

IGIGSFGSVYKGILDGGETLIAIKVFNLMMRGAFKSFLAECEALRNIRHRNLVKVLTACSSVDYQ  
GNDFKALVYEFMVNGSLEEWLHPLVETRNLNILQRLNIAIDVACALDYLHHRCEQIVHCDLK  
PSNVLLDKELTGCVGDFGLARILPEAIYNNTNESSSIGVRGTIGYAPPEYGIGNEVS

>VFLRR-RLK101

FSIRNLIGTGGFGSTYKAELAPGYLVAVKRLSLGRFQGIQQFDAEIRTLGRIRHKNLVTLIGYYV  
GEAEMFLIYNLSGGNLETFIHERSSKNVQWSVIYKIAFDIAQALAYLHYSVCVPRILHRDIKPSN  
ILLDEELNAYLSDFGLAKLLEVSQTHATTDVAGTF

>VFLRR-RLK102

LSRTRYGLVFKACYNDGMVLSIRRLPDGLMDENMFRKEAEFLSKVKHRNLTVLRGYAGQQQ  
DLRLVVDYDMPNGNLATLLQEASHQDGHVLNWPMLHIALGIARGLAFLHTSNMVHGDVKP  
QNVLFDAADFEAHLSDFGDLRLTIATPAEASSSTTVGTLGYVSPEAILTGEVSKESDVYSFGIVLLE  
LLTGKRPVMFNEDEDIVKWVKKQLQRGQITELLEPLGLELDPESEWEEFLGVKVGLLCTAP  
DPLDRPTMSDIVFMLEG

>VFLRR-RLK104

MVIFCRMKRRGATTQSNKEGNLVSLIGYCDDRHNKALIYEMYVYGNLREHLSETSGSILNWDE  
RLQIAVDAAHGLEYLHNGCKPPIHRDLKTSNILLNDKLQAKIADFGLSRAFKNESGSHITTHPA  
GTYGYLDPEAHATANFSQKSDVYSFGIILLELITGQPAIKRDMTGKIILIKWVTSIHERGDIQSLV  
DPRLQGGQFDNSAWKVVTALTCVLNSAIQRPDMSHVLAELKE

>VFLRR-RLK108

LSRTRYGLVFKACYNDGMVLSIRRLPDGLMDENMFRKEAEFLSKVKHRNLTVLRGYAGQQQ  
DLRLVVDYDMPNGNLATLLQEASHQDGHVLNWPMLHIALGIARGLAFLHTSNMVHGDVKP  
QNVLFDAADFEAHLSDFGDLRLTIATPAEASSSTTVGTLGYVSPEAILTGEVSKESDVYSFGIVLLE  
LLTGKRPVMFNEDEDIVKWVKKHYRE

>VFLRR-RLK109

IIGASSLSTVYKGQLEDGQMVAVKKLNLQQFPAESDKSFYREVKTLSQLRHKNLVKVLGYAWE  
SRKLKALVLEYMNNGSLESIIHDAHVDQSKWTLSQRIDVWISVASGLEYLHSGYDFPIVHCDLK  
PSNILLDSSWVAHVSDFGTARILGVHLQDGSSSLSSSAFQGTIGYLAPEFAYMRKVTTKVDVFSF  
GIIIMEFLTKRRPTGLTEEHGIPISLSQLFEKALGNGINGLLQVLDPVIAMNASKDEQTLTELFKL  
ALCCTNPNPDDRPNMNEVLSSLNKL

>VFLRR-RLK111

SKSFIAECKALRNIRHRNLVKILTYCSSIDFKGNDFKALVFDFMENGSLDTWLHQEGKGNTQVQ  
NLNQLRLHIAIDVSFALLYLHDDCEAPVIHCDLKPSNILLDNEMTAHVGDGFLSKLLSKTINNS  
SLGQTSSIGIKGTIGYMAPEYGIGSEATTSGDVYSFGIILLEIFTGKKPTDEMFINGLNLHNFVKA  
KIPGQVMQVVDPKLELGDNNVQKCIVSILEIGLACSAEQVGERMNMVDVTRKLN

>VFLRR-RLK114

KVGEGGFGIVYKGVLDGTVAAIKVLSPESRQGVREFLTEIKLIADVEHDNLVKLYGCCVEEDH  
RILVYGYLKNNSLAQTLLGGGHSSIQFNWPTRCRICIGVAQGLAFLHEEVQPHIVHRDIKASNIL  
LDENLMPKISDFGLAKLFPPNLTHISTRVAGTAGYLAPEYAIRGQLTRKADIYSFGVLLLEIVCGR

SNTNRRLPPEEQYLLERVWDSHEKGELVSLVDASLNEDYDTEEACKYLKIGLLCTQDMPKLRP  
TMSTVVKMLMG

>VFLRR-RLK118

MEKRSLDQWLHSHKKRSTNVSGSASHLYLDWPKRFRIAVEAAQGLSYMHHDCLPPIIHRDVKSS  
NILDSSFKAKIADFGLARLLVKKGEATVSAVAGSFGYIAPEYAQTYRVNEKIDVYSFGVVLEL  
TTGKEANFGDENSCLADWAWRYMNEGNPIVHALDKEIKNPSYFDEMSIVFKLGVRCTSKLPSA  
RPSMGEVLQILD

>VFLRR-RLK119

SKISMKIDGVKFFTFREMALATENFNSKTQVGQKEFLTEIRLLSRLHHRNLVSLVGYCDEEGEQ  
MLVYEFMPNGTLRNWLSAKAKETLNFQMRLNTALGSAKGILYLHTEADPPVFHRDIKASNILL  
DSKLTAKVADFGLSRLAPVLDDEGNLSNHVSTVVKGTPGYLDPEYFLTHKLTDKSDVYSLGIVF  
LEFLTGMQPISHGKNIVREVTMAHQSGIMFSIIDS RMG SYPSECVEKFVALALGCCHDKPENRP  
SMSEVVRELENI

>VFLRR-RLK121

LNKDCELGRGGFGVVYRILRDGRSVAIKKLTVSSLIKQDEFEKEVKRLGKIRHHNLVALEGY  
YWIPSLQLLIYEFISSGSLYKHLHDGPNTNCLSWRQRFNII LGMAKGLAHLHMHNIHYNLKST  
NILIDDSGEPKVGDFGLARLLPMLDRCILSSKIQSALGYMAPEFACRTVKITEKCDVYGFILVL  
EVVTGKRPEYMEDDVVLC DMVKGALEDGRVDECVDGRLRGNFPADEAIPVIKLG LICASQ  
VPSNRPDMEEVVNILELI

>VFLRR-RLK123

ILGRGRSGIVYMTLP SGSTVAVKRFKTMDKFSA AAFSSEIATLARIRHRNIVRLLGWGANRKT  
KLLFYDYMSNGTLGALLHEGSIVGLVEWETRFKIALGVAEGLAYLHHDCVPPILHRDVKAHNI  
LLGD RYEAC LADFG LARLVEDDQGSFSATPQFAGSYGYIAPEYACMLKITEKSDVYSYGVVLL  
EIITGKKPVDPSFAEGQHVIQWVREQLKSKKDPVEILDPKLQGH PDTQIQEMLQALGISLLCTSN  
RAEDRPTMKDVAALLREI

>VFLRR-RLK130

KVGEGGFGIVYKGV LKDGTVAAIKVLS PESRQGVREFLTEIKLIADVEHDNLVKLYGCCVEEDH  
RILVYGYLKNNSLAQTLLGGNRSSIQFNWPTRCRICIGVAQGLAFLHEEVRPHIVHRDIKASNIL  
LDENLMPKISDFGLAKLFPPNLTHISTRVAGTAGYLAPEYAIRGQLTRKADIYSFGVLLLEIVCGR  
PNTNRRLVP EEQYLLERVWDLHEKGELVSLVDTSLNEDYN AEEACKYLKIGLLCTQDMPKLRP  
TMSTVVKMLMG

>VFLRR-RLK131

IGRGGAGIVYKGIMPNGEQVAVKKLLGISKGSSHDNGLSAEIQTLGKIRHRNI

>VFLRR-RLK134

VGQGGYGKVYRGILADNTIVA I KRAEEGSLQGQKEFLTEIRLLSRLHHRNLVSLVGYCDEEGEQ  
MLVYEFMPNGTLRNWLSAKAKETLNFQMRLNTALGSAKGILYLHTEADPPVFHRDIKASNILL  
DSKLTAKVADFGLSRLAPVLDDEGNLPNHVSTVVKGTPGYLDPEYFLTHKLTDKSDVYSLGIVF  
LEFLTGMQPISHGKNIVREVTMAHQSGIMFSIIDS RMG SYPSECVEKFVALALGCCHDKPENRP  
SMSEVVRELENI

>VFLRR-RLK138

VIGTGSSGVVYKVTIPSGDSLAVKKMWSSEESGAFSSEIQTLSIRHKNIIRLLGWGSNRNLKLL  
FYDYLPNGSLSSLLHGAGKGGAEWETRYDIVLGVAHALAYLHHDCLPAILHGDVKAMNVLLG  
PSYEPYLADFG LARVVSSNSDDLAKPSQRPHLAGSYGYMAPEHASIQRITEKSDVYSFGVVLL

EVLTGRHPLDPTLPGGAPLVQWVRDHLARKKDPVDILDHKLGRADPTMHEMLQTLAVSFLCI  
STKADDRPTMKDIAAMLKEI

>VFLRR-RLK140

IIGRGGYGNVYKGELPDGSQVALKRFKNLAAAGDASFVHEVKVIASVRHVNVALRGYCTATT  
PFEGHQRIIVCDLMKNGSLHDHLFGSAKEKLSWPIRQKIALGTARGLAYLHYGAQPAIIHRDIK  
ASNILLDEKFDKAVADFGFLAKFTPEGVTHVSTRVAGTMGYVAPEYALYQGLTERSDVYSFGVV  
LLELLSGKKALTMSDESQPASVSDWAWSLVRRGRITLDVIEDGMPPELGPQEILEKYVLI AVLCSH  
PQLYARPTMDQVVKMLE

>VFLRR-RLK143

IGEGGFGFVYKGRLEDGKFVAVKVLSADSKQGDREFLSEIALLSNISHQNLVKLYGGCIDGPCRI  
LVYEYLEKGNLAQILLGRSKSRAKLSWKARREISIGIGELAYIHEEIKPHIVHRDLKASNILLD  
QNFTPKVSDFGLSKLFSENLTISTRVAGTLAYVAPEYAI SGHLTRKSDVYSYGVLLLEIVSGRTA  
VDFDLQLGEHYLVEKAWEMYKDDKLHQLVDPILNGNFIEDEALRFLKVGLLCVQEKCGLRPN  
LSKAIKMMKG

>VFLRR-RLK145

DNKIGEGGFGSVYWGRTSKGVEIAVKRLKAMSAKAEMEFAVEVEILGRVRHKNLLGLRGFYA  
GGDERLIVYDYPNHLITHLHGQLASDCLLDWPRRIKIVIGSAEGLAYLHHKANPHIIHRDIK  
ASNVLDDKEFQAKVADFGFAKLIPDGVTHLTTRVKGTGLGYLAPEYAMWGKVSESCDVYSFGIL  
LLEIISARKPLKKLPGGVKLDIVHWVTPYVQKGAFDHIADPMLKGKYDLAQLKSAIMVAMRC  
TDSNPENRPSMIQVVDWLKG

>VFLRR-RLK148

LGKSNFSATYKGILRDRSVVVVKCITKTSCKSDEADFLKGLKILTSFKHENLVRLRGFCCSKGR  
GECFLIYDFVPNGNLLEYLDVKEGSGRVLEWSTRISIINGIAKGIGYLHGNGKNKSALFHQNISA  
EKVLIDRRYNPLSDSGLHKILADDIIFSMLKASAAMGYLAPEYTTTGRFTEKSDVYAFGMILQ  
ILSGKSNVTPLTRHAVESCKVEDFIDANLERNFPGSEAA

>VFLRR-RLK150

NIIGKGCSCGMVYRVETPLKQVIAVKKLWPVKNGEIPERDWFSAEVRTLGSIRHKNIVRLLGCCN  
NGKTRLLLLFDYISNGSLAGLLHEKKLFLDWDARYNII LGAAHGLEYLHHDCTPPIVHRDIKAN  
NILVG PQFEAFLADFGFLAKLVDSAECRSVSNTVAGSYGYIAPEYGYSFRI TEKSDVYSYGVVLL  
EVLTGREPTDTQIPEGAHIVTWVTKELRERKRDFTTILDQQLLLRSGTQLQEMLQVLGVALLCV  
NPSPEERPTMKDVTALLKEI

>VFLRR-RLK154

ILGATGSSIMYKAVLEDGTALAVRRIGENHVERFRDFETQVRVIAKLVHPNLVRIRGFYWGVDE  
KLIIYDFVPNGSLSNARYRKVGSSPCHLPWEARLKIAKGVARGLSFLHDKKHVHGNLKP SNILL  
GSDMEPRIGDFGLERLVMGDSSYKSSGSTRNFGSKRSTASRDSFQDFPLGPSPSPSPSSIGGLSPY  
HAPESLRSIKPNPKWDVYSFGVILLELTGKVIVVDELGQGNGLVDDKNRAMRMADV AIR  
AEVDGKEESLLACFKLGYNCASPIPQKRPTMKEVLQVLEKI

>VFLRR-RLK155

IGSGGFGATYKAEIVPGVVVAVKRLSVGRFQGVQQFATEIRTLGRVQHHPNLVKLIGYHLSETEM  
FLIYNYPGGNLETFIQERSRRVVEWSMLHKIALDIARALAYLHDECVPRLVHRDIKPSNILLDN  
NFNAYLSDFGLARLLGTSETHATTDVAGTFGYVAPEYAMTCRVSDKADVYSYGVVLELISDK  
KALDPSFSSFGNGFNIVAWASMLLRQGRASEFFTAGLWDSGPHNDLIQILHLGIMCTGESLSSRP  
SMKQVAQRLKRI

>VFLRR-RLK156



VGDGSFGFVYKASLSDGVIVAIIKLDTNAFQGFREFRAEMETLGKLQHPNIVRILGYCVSGAD  
RVLIYEFIEKGNLDQWLHDTSPGNCNEQSSKLPLSWKTRIKVVKGLANGLAYLHQLDTPIIHRD  
IKATNVLLDSDFEAHIADFGALARALDGSHSHVST

>VFLRR-RLK158

ILGQGGFGKVYKGVLPDNTKVAVKRLTDFESPGGDAAFQREVEMISVAVHKNLLRLIGFCTTPS  
ERLLVYPFMMNLSVAYRLRERKPEEAVLDWATRKKVALGAARGLEYLHEHCNPKIIHRDVKA  
ANVLLDEDFEAVVGDFGLAKLVDVRKTNVTTQVRGTMGHIAPEYLSTGKSSEKTDVFGYGIM  
LLELVGTQRAIDFSRLEEDDVLLLDHVKKLEREKRLDAIVDRNLNKNYNILEVEMMIQVALL  
CTQASPEDRPAMSDVVRMLEG

>VFLRR-RLK161

IGVGSYGSVYRGILEQVEIEVAVKVINLQQRGASNSFISECQALGSIRHRNLLKLLSVCSSMNFK  
GNDFKALIYEFMANGSLEKWLHVHVGQERNSTNLKLIHRLNIAIDIAFAIEYLHNGSSSTIIHGDL  
KP

>VFLRR-RLK163

IGTGSFGSVYKGILDKEEGKIIAVKVLNLMHHGAFKSFVAECEALKNIRHRNLVKLITACSSTDY  
QGNDFKALIYEFMVNRSLEEWLHPTFELDEATKSLDLLQRLNIAIDVASALQYLHHHCEKTIVH  
CDLKPSNILLDDMIGHVSDFGGLAKILFQDTFYSSTNQSSSVGVGTIGYTPPEYGVGSKVSTY  
GDTYSYGILLLEMFTGKRPTDDMFGENMNLHNFVKTNLPKQVVQLIDPILFQEIFNSSKIKNHT  
RNIEGIKNNGILECLISIFEIGIACCIDL PQDRMNIGNVVAQLSSI

>VFLRR-RLK164

IGNGGFGLVYKGCLGDGSAVAIKVIDITQTGFRKSFLAECEALRNVRHRNLVKLITSCSSVDLKN  
TEFLALVYEFLGNGSLQDWIQGKRKNEDGDGLNLVERLNVAIDIASAIDYLHNDCEVPVLHCD  
LKPNNILLDEDMTAKVGD

>VFLRR-RLK165

IIGQGGFGKVYKGVLPDNTKVAIKRLTDYYSPGGEEAFQREVQLISVAVHRNLLRLIGFCTTSSE  
RILVYPYMRNLSVAYQLRELKPGEKGLDWPTRKRVAFGAAHGLEYLHEHCNPKIIHRDLKAAN  
ILLDDNFEAVLGDFGLAKLVDTKLTHVTTQIRGTMGHIAPEYLSTGKSSEKTDVFGYGITLLELV  
TGQRAIDL SRLEDEEDVLLLDHIKKLLREDRLDDIVDGNLKTYNRQEVKTIHQVALLSTQSSPED  
RPTMAEVVKLLQGV

>VFLRR-RLK166

LDEEDVVGSGGFGTVYRMVMNDCGTFVAVKRIDRSREGSDQVFERELEILGSIKHINLVNLRGY  
CRLPMAKLLIYDYLAMGSLDDILHEHVQEQLNWSARLSIALGSARGLAYLHHDCSPKIVHRD  
IKSSNILLDENLEPHVSDFGGLAKLLVDEDAHVTTVVAGTFGYLAPEYLQSGRATEKSDVYSFGV  
LLELVGTGRPTDPAFVKRGLNVVGWLNLTLLRENRLDDVVDKRC KDADMETVEAILEIAARC  
TDANPDDRPTMNQVLQLE

>VFLRR-RLK167

IIGQGGFGKVYKGVLPDNTKVAIKRLTDYYSPGGEEAFQREVQLISVAVHRNLLRLIGFCTTSSE  
RILVYPYMRNLSVAYQLRELKPGEKGLDWPTRKRVAFGAAHGLEYLHEHCNPKIIHRDLKAAN  
ILLDDNFEAVLGDFGLAKLVDTKLTHVTTQIRGTMGHIAPEYLSTGKSSEKTDVFGYGITLLELV  
TGQRAIDL SRLEDEEDVLLLDHIKKLLREDRLDDIVDGNLKTYNRQEVKTIHQVALLSTQSSPED  
RPTMAEVVKLLQGV

>VFLRR-RLK168

LDIRHVVAHGTYGTVYRGTYDDQDVAVKLLDWGEDGIATTTETAALRASFQQEVAVWHKLDH  
PNVTKFVGASMGTSNLKVPIKSDGQESFPSRACCVVDYLAGGTLKQYLIRNRRKKLAYKV

VIQLALDLSRGLSYLHKKIVHRDVKTENMLLDTHRTLKIADFGVARVEAQNPRDMTGETGTL  
GYMAPEVLDGKPYNRRCDVYSFGICLWEIYCCDMPYPDLSFADVSSAVVRQNLRPEIPRCCPSS  
LAGIMRKCWDANPEKRPEMSEVVRL

>VFLRR-RLK170

FSIRNLIGTGGFGSTYKAELAPGYLVAVKRLSLGRFQGIQQFDAEIRTLGRIRHKNLVTLIGYYV  
GEAEMFLIYNYSGGNLETFIHERSSKNVQWSVIYKIAFDIAQALAYLHYSCVPRILHRDIKPSN  
ILLDEELNAYLSDFGLAKLLEVSQTHATTDVAGTF

>VFLRR-RLK172

IGEGGFGPVYKGVLSDGAVIAVKQLSAKSKQGNREFVNEIGMISALQHPNLVRLYGCCIEGNQL  
LLVYEYLENNSLARALFGREDQRLQLDWSTRKKI

>VFLRR-RLK174

CIGVGAHGNVYKAQLSINKIVALKKLHHSKAENLVNEVEVLTRIRHKNIVKLYGFCLHRRSMF  
LIYEYMEKGSFHALRNDTEAMELNWNIRVKIHKDIAFAVSYLHHGCNPPIVHRDISSKNILLNL  
ELKAFVSDFGLARLLDPDSSNQTTMAGTYGYMAPELAYTIVMTEKCDVYSFGVVVALELLMGT  
HPGEFLSSSLTQNIMLNELLDLSDRLAPPSNDIDVQDIIFVATIAFSCLCATPKSRPTMEFLSQDFL

>VFLRR-RLK175

IGVGAHGNVYKAQLSINKIVALKKLHHSKTENLVNEVEVLTRIRHKNIVKLYGFCLHRRSMFLI  
YEYMEKGSFHALRNDTEAMELNWNIRVKIHKDIAFAVSYLHHGCNPPIVHRDISSKNILLNLEL  
KAFVSDFGLARLLDPDSSNQTTMAGTYGYMAPELAYTIVMTEKCDVYSFGVVVALEILMGTHP  
GEFLSSSLAQNIKNELLDLSDRLAP

>VFLRR-RLK176

IIGRGGYGNVYKGELPDGSQVALKRFKNLAAAGDASFVHEVKVIASVRHVNLVALRGYCTATT  
PFEGHQRIIVCDLMKNGSLHDHLFGSAKEKLSWPIRQKIALGTARGLAYLHYGAQPAIIHRDIK  
ASNILLDEKFDKADVDFGLAKFTPEGVTHVSTRVAGTMGYVAPEYALYGQLTERS DVYSFGVV  
LLELLSGKKALTMDESQPASVSDWAWSLVRRGRITLDVIEDGMPPELGPQEILEKYVLIAVLCSH  
PQLYARPTMDQVVKMLE

>VFLRR-RLK177

IGIGSFGSVYKGILDREGIVIAVKVLNLTRHGASKSFAAECETLRNIRHRNLVKVLTACSGVDYH  
GNDFKALVYEFMANGSLDGWLHPTIGLDKAPKTLNVLQRLNIAIDVACALEYLHYHCVTPVIH  
CDLKPSNILLDENMTGHVSDFGLVKFLSNETLDNFNQFSSIGVVRGTIGYCPPEYGIGSEVSTFG  
DIFSFGILLLEMFTGKRPIDDMFKESNLHSFVKRALPDQVTQVIDPSL

>VFLRR-RLK178

IGTSFGSVYKGILDREGIVIAVKVLNLTRHGASKSFAAECETLRNIRHRNLVKVLTACSGVDYH  
GNDFKALVYDFMANGSLDGWLHPTIGLDKAPKTLNVLQRLNIAIDVACALEYLHYHCVTPVIH  
CDLKPSNILLDENMN

>VFLRR-RLK182

LGKGGFGTVYHGSDDGTQVAVKMLSPSSIQGYKEFQAEVKLLLRVHHRNLTTLVGYCNEET  
NKGLIYEY MAYGNLEDYLSDTNSNTLNWATRLRIALEAAQGLEYLHNGCKLQIVHRDVKTNNI  
LLNEKFQAKLADFGLSRIFPADGGTHVSTIVAGTPGYLDPEYYITNWLTDKSD

>VFLRR-RLK183

FSNIIGSSQDSFVYKGTMKGGSEIAVISLCIKEEHW TGYLELYFQKEVADLARLNSENTGKLLGY  
CSESTPFTRMLVF EYASNGTLYEHLHYGEGCQLSWTRRMKIVIGIANGLKYLHTELDPPFTISEL  
NSSAVYLTDDFSAKLVDFESWKSILARSEKNSGSGSQAICLLPNSIEGRHLDVQGNVYAFGVL

LLEIISGRPPYCKDKGCLVDWAKEYLEMPEVMSYVVDPELKHFKYEDLKVICEVVSLCIHPEPA  
KRPSMEEISSILE

>VFLRR-RLK185

KLGRGGFGIVYKGTLSGRQVAVKTLAQSQQGVREFLNEIDTISKVRHPNLVELLGCCIQGTN  
RILVYEYVENNSLDQALLGSKNSCIKLDWKKRSAICLGIARGLTYLHEELVPHIVHRDIKASNIL  
LDKEFNPKIGDFGLAKLFPDNITHISTRIAGTTGYLAPEYALGGQLTMKADVYSFGVLILEISGR  
SSVRASWGETQKLLLEWAWQLHEEGKHLELVDPELGEFPEEEVIRHMKVAFFCTQGAANRRP  
LMSQVVNMLSK

>VFLRR-RLK186

IGVGSYGSVYKGFLEQVGIEAAVKVLNLQRRGALKSFVSECQALRTIRHRNLLKLLNVCSSIDF  
EGNDFKALIYEFMEKGSLEEWLHAHNAGEDGQEREFGNLKLIDRVNIAIDIANAIEYLHNGSSS  
TIVHGDLP

>VFLRR-RLK187

KNILGAGGFGNVYKGLGDGTMVAVKRLKDVSNGAGESQFRTELEMISLAVHRNLLRLIGYC  
ATPNERLLVYPYMSNGSVASRLRGKPALEDWNTKRKIAIGAARGLLYLHEQCDPKIIHRDVKAA  
NVLLDDFCEAVVGDFGLAKLLNHADSHVTTAVRGTVGHIAPEYLSTGQSSEKTDVFGFGILLIE  
LITGMRALEFGKTVNQKGAMLEWVKILQEKKVEELVDRELRSNYDLIEIGEMLQVALLCTQ  
YLPAPHRPKMSEV

>VFLRR-RLK188

IGTGSFGSVYKGILDKEEGKIIAVKVLNLMHHGAFKSFVAECEALKNIRHRNLVKLITACSSTDY  
QGNDFKALIYEFMVNRSLEEWLHPTFELDEATKSLDLLQRLNIAIDVASALQYLHHHCEKTIVH  
CDLKPSNILLDDMIGHVSDFGLAKILFQDTFYSSTNQSSSVGVRGTIGYTPPEYGVGSKVSTY  
GDTYSYGILLLEMFTGKRPTDDMFGENMNLHNFVKTNLPKQVVQLIDPILFQEIFNSSKIKNHT  
RNIEGIKNNGILECLISIFEIGIACCIDL PQDRMNIGNVVAQLSSI

>VFLRR-RLK189

LDEEDVVGSGFGTVYRMVMNDCGTFVAVKRIDRSREGSDQVFERELEILGSIKHINLVNLRGY  
CRLPMAKLLIYDYLAMGSLDDILHEHVQEQPLNWSARLSIALGSARGLAYLHHDCSPKIVHRD  
IKSSNILLDENLEPHVSDFGLAKLLVDEDAHVTTVVAGTFGYLAPEYLQSGRATEKSDVYSFGV  
LLELVTGKRPTDPAFVKRGLNVVGWLNLTLLRENRLDDVVDKRCKDADMETVEAILEIAARC  
TDANPDDRPTMSQVLQLE

>VFLRR-RLK190

FKEVIGRGSFGSVYLGKLSDGKQVAVKVRFDKTQLGADSFINEVYLLSQIRHQNLVCLEGFCYE  
SKQQILVYEYLPGGSLAEHLYGLNSQKVSLSWVRRLKIAVDAAGLDYLNHNGNEPRIHRDVK  
CSNILLDKDMNAKVCDFGLSKQVMQADASHVTTVVKGTTAGYLDPEYYSTQQLTEKSDVYSF  
GVVLELICGREPLRHSGTPDSFNLVLWV

>VFLRR-RLK193

EIGKGHIGIVYKAGMPFNVTFVAVKKISPQKKQKEKDKIQREIFNLLSLRHENLVQLLGSCSRKG  
HHILYIYEMENGLHQALFEPDSTIELDWKARYDICLGIAGLKYLEDKRFEIVHGNITARNIL  
LDKNHTPKISDFGLARFRDDEDAFTTIKTRERLYVAPEYFLGKAITVKADVYSFGVVALEIVSGR  
TSMEQRPNQEYDVLLDTAYVLYAKGKILNLVDEKLSSSYDRKQALILLDIAIMCINSQSPSLRPK  
MSDVVSVL

>VFLRR-RLK194

IGKGGYGTVYKANLPSGSTVAVKKLHPLGNGERPYPYQKEFLNEIRALTEIRHRNIVRLHGFCSYA  
SHSFLVYEYLEGGSLAAVLGNDKEAKELDWSKRVNIVKGVAQALSYMHHDCSPPIVHRDIKSK  
NILLDSEYEAHISDFGTAKLLNLDSSHW TALAGTYGYVAPEFAYTMK

>VFLRR-RLK195

IGKGGYGTVYKANLPSGSTVAVKKLHPLGNGERPYPYQKEFLNEIRALTEIRHRNIVRLYGFCSYA  
RHSFLVYEYLEGGSLAAVLGNDKEAKELDWSKR

>VFLRR-RLK197

FEKKIGSGGFGVYYGKMKDGKEIAVKVLTNSNFQGKREFSNEVTLLSRIHHRNLVQFLGFCQ  
DDGRSMLVYEFMHHGTLKEHLYGPLTHGRNINWIKRLEIAEDAAKGIEYLHTGCVPAIIHRDLK  
TSNILLDKHMRKAVSDFGLSKLAVDGVSHVSSIVRGTVGYLDPEYYISQQLTDKSDVYSFGVIL  
LELMSGQEAISNESFGVNCRNIVQWAKLHIESGDIQGIIDPSLNDEYDIQSMWKIAEKALMCVQ  
PHGHMRPSISEVLKEIQ

>VFLRR-RLK199

LAEGKFGPVYRGFLPGGIHVAVKVLVHGSTLTDQEAARELEYLGRIKHPNLVPLTGYCIAGDQR  
IAIYDYMENGNLQNLHDLPLGVQTTEDWSTDTWEEDDNNGIQNVGSEGLLTTWRFRHKIAL  
GTARALAFHHGCSPLIHRDVKASSVYLDYNLESRVSDFGLAKIFGNGLDEEIARGSPGYVPP  
EFSDPDNNSPTPKSDVYCFGVVLFELITGKKPVGDDYPEEKEATLVSWVRGMVRKNQGSRTID  
SKIRDTGPEYEMEETLKIGYLCTADIPSKRPSMQQIVGLLKDI

>VFLRR-RLK200

LAEGKFGPVYRGFLPGGIHVAVKVLVHGSTLTDQEAARELEYLGRIKHPNLVPLTGFCIAGDQRI  
AIYDYMENGNLQNLHDLPLGVQTTEDWSTDTWEEDDNNGIQNVGSEGLLTTWRFRHKIALG  
IARALAFHHGCSPLIHRDVKASSVYLDYNLESRVSDFGLAKIFGNGLDEEIARGSPGYVPP  
SDPDNNSPTPKSDVYCFGVVLFELITGKKPVGDDYPEEKEATLVSWVRGMVRKNQGSRTIDSK  
IRDTGPEYEMEETLKIGYLCTADIPSKRPSMQQIVGLLKDI

>VFLRR-RLK201

HFGKESLLSEGRCPYRAVLPGDVHVAIKVLENARGIDYEEAVTIFEGLSRLKHPNLLPLCGYC  
IAGKEKLVLYEFMANGDLHRWLHELPTLVPNVEDWSTDTWEHQNISGSHIFSPEEKTNWLTRH  
RIAVGVARGLAYLHHAGSIHGLVASNILFSDTLEPRVADFGLRNISPKNKHIVENNGIEFDVYCF  
GVVLIELLTGKQGSEETVEWVRRLVREGRGADALVPTLTVSGESVSEMVECLRVGYLCTAELP  
GKRPSMQQVLGLLKDI

>VFLRR-RLK204

IGIGHFSSVYKGKLDGKEVAIKAFNVEEETSLRSFDLECEVF SRVSHPNLVRTVCISNSINFKAL  
VMEYMANGSLEKWLHHTHKYDLQRFDIMIETAKAVRYLHQRCIIHCDIKPSNIILDEDMVAH  
VSDFSIAKIQPVSRIRTIQSKLMCTIGYVAPEYGRYGIVSASMDVYSFGILLMETFTGKKPTHEM  
FTGEMNLRRWVIESLPCEVERVIDPSLLQTEENNDVYMKCISSVMRLALICSAESP SERLNMR  
DVEEKLNNI

>VFLRR-RLK205

IGIGHFSSVYKGKLDGKEVAIKVFNVEEETSLRSFDLECEVF SRVSHPNLVRTVCISNSINFKAL  
VMEYMANGSLEKWLHHTHKYDLQRFDIMIETAKAVRYLHQRCIIHCDIKPSNIILDEDMVAH  
VSDFSIAKIQPVSRIRTIQSKLMCTIGYVAPEYGRYGIVSASMDVYSFGILLMETFTGKKPTHEM  
FTGEMNLRRWVIESLPCEVERVIDPSLLQTEENNDVYMKCISSVMRLALICSAESP SERLNMR  
DVEEKLNNI

>VFLRR-RLK206

IGSGGSGQVYKVKLKSGQIVAVKRLWGGNNKKPETESVFRSEVETLGRVVRHGNIVKLLMCCSG  
EEFRILVYEYMENGLGDVLHGEKDGGLMDWTERFAVAVGAAQGLAYLHHDCVPPIVHRDVK  
SNNILLDEEMRPKVADFGGLAKTLQSDVGEQDAVMSRIAGSYGYIAPEYAYTLK

>VFLRR-RLK208

KFNEINLLGRGSFGSVYKGTLDGDMNVAVKVFNLQLEAGFKSFDVECEVLRIRHRNLVKIITA  
CCNIDFKALVLEFMPNWSLEKWLYSHNYFLDILQRMNIMVDVALALEYLHYGSTTPVVHCDL  
KPSNILLDEGMVGHVSDFGIKLLGEENSIIQTMTLATVGYMAPEYGSEGLVSIKGDITYSYGIV  
VMETFTRKRPTDEMFTTEEMSMKQWVRDSLSPCGVTEIADSNLLRHNEQHFFAKKDCIESTLL  
LAQKCCADLPEERTDIRDVLSTLKKI

>VFLRR-RLK212

ILGATGASIVYKAVLADGTAFVRRIGESGVERFRDFENQVRIIAKLRRHPNLVKVRGFYWGND  
KLVLYDYVSNGSLASSNYKKPGSSPFHLPLEVRFKIARGLARGLAFIHEKKHVHGSIKPSNILLN  
FDMEPIISDFGLDRLVLGNNSYKASNSGRNFGSQRSNSTPQDHPITASPYATPSSSSSTTITSPYQA  
PESLKNLKPMPKWDVYAFGVILLELLTGRVVSRELQWTAGLIVEDKDRVRLADVAIRVDVE  
AKEDAMLACFKLGFSCVSFVPQKRPSMKEAVQVLEKI

>VFLRR-RLK213

FDTMFMFGHGYQGQLYKGWLRDGLMVLKCVKLKQKNLPQSLVQHMEVLSKLRHLHLVSV  
LGHCIVTYQDHPRTASSTVFLVLEQISNGSLQDYLKDWRRKDVLPQRMATIGIARGIQFLH  
TGVAPAIFGNNIKIENVLLDESLTAKLSNYNIPLPSKVGSESPYQDSINAEKEDVYQLGVILVQ  
VITGKIVTSPSELEELKIQLEKGLAESPLKLQAMVDPSTRGTTFAYESLRTTVKITINCISKELSNRP  
SIEDVL

>VFLRR-RLK218

IGEGGTGKVKVEMPGSQVLAVKKLNYSKGDGEVSRIKIFSSEVAALAEHRHRNIVKLHGFYA  
RGKHTFLAYEFIENGLANMLSSEKGAELNWEKRIKIVKGVAAHALSYMHHDCNPPIIHRDISS  
NNILLNSELEAYVSDFGTARFWKPDLSNWTIAGTYGYVAPELAYTAAVTEKCDVYSFGVLTLE  
VLIGKQPGELISYLSLTHLEDVLDGRLSLPSDQQLADKLSCVLTIAFTCLRPNPQSRPSMRNVS  
QLLD

>VFLRR-RLK219

IGEGGCSNVYKGCLRKCKPVAIKVLKQYKEAWNDFSFEVDIMSSLKHKNITHLIGVCIEDDHLI  
LVYDFLSKGSLEERLQG

>VFLRR-RLK220

LGEGGYGPVYKGTLSDGKRVAVKLLSLASNQKSEFVTEIATISAVQHRNLVKLYGCCIEGNRR  
LLVYEYLENKSLDKALFATCAGKTSLHLDWPTRFDICLTARGLAYLHEESRPRIVHRDVK

>VFLRR-RLK222

FKEVIGRGSFGSVYLGKLSDGKPVAVKVRFDKTQLGADSFINEVYLLSQIRHQNLVCLLEGFCYE  
SKQQILVYEYLPGGSLAEHLYGLNSQKVSLSWVRRLKIAVDAAKGLDYLNHNGNEPRIIHRDVK  
CSNILLDKDMNAKVCDFGLSKQVMQADASHVTTVVKGTAGYLDPEYYSTQQLTEKSDVYSF  
GVVLELICGREPLRHSGTPDSFNLVLWAKPYLQAGAFEIVDDSIKGTDFVESMRKAATVAVRS  
VERDAAQRPNIAEVLAEKE

>VFLRR-RLK225

HFGKESLLSEGRCPYRAVLPGDVHVAIKVLENARGIDYEEAVTIFEGLSRLKHPNLLPLCGYC  
IAGKEKLVLYEFMANGDLHRWLHELPTLVPNVEDWSTDTWEHQNISGSHIFSPEEKTNLWLRH  
RIAVGVARGLAYLHHAGSIHGLVASNILFSDTLEPRVADFGLRNISPKNKHIVENNGIEFDVYCF

GVVLIELLTGKQGSEETVEWVRRLVREGRGADALVPTLTVSGESVSEMVECLRVGYLCTAELP  
GKRPSMQQVLGLLKDI

>VFLRR-RLK228

LGRSSHGTSYRATLDNGMFLTVKWLREGVAKQKKEFAKEAKKFANIRHPNVVGLRGYYWGP  
TQHEKLILSDYISPGSLASFLYDRPGRKGPPPLTWVQRLKIAVDVARGLNYLHFDRAVPHGNLKA  
TNILLDGPDLNARVADYCLHRLMTQAGTIEQILDAGVLGYRAPELAASKKPLPSFKSDVYAFG  
VILLELLTGRCAGDVISGEEGGVDLTDWVRLRVTEGRGSDCFDPALMPEMSNAVEKGMKE

>VFLRR-RLK230

LNEEHVIGFGGFGTVYKLAMDDGNVFALKRILKMNEGFDRFFERELEILGSIKHRYLVNLRGY  
CNSPTSKLLIYDYLPGGSLDEALHERSEQLDWDARLNIIIMGAAGLAYLHHDCSPRIIHRDIKSS  
NILLDGNLEARVSDFGLAKLLEDEESHITTIVAGTFGYLAPEYMQSGRATEKTDVYSFGVLVLE  
VLSGKRPTDASFIEKGLNIVGWLNFLVTENRPREIADPNCEGVQIESLDALLLVATQCVSSSPED  
RPTMHRVVQILE

>VFLRR-RLK232

VLKLASSLTPLPTGWSTKSSSGFCNWKGIECDSSNRVTSISLPNKDLTGSLPSELSTLTQLKTL  
QNNHLSGDLPLLANFSNLQSIFLDFNFTSIPSGFFKGLTSLQTLGNNVN LAPWQLPTDLTES  
TTLNSITASQSNIYGSIPDIFGSLPSLQSLRLSYNNLTGSLPQSMANSIGIQLWINNQIGLTGTIG  
VLATMTQLSQVWLQKNQFTGSIPDL SKCDSLFDLQLRDNQFTGVVPSSLISLPNLVNISLSNNK  
LQGPSPVFSSSVKVVNDGKNNYCTVSGKACDPQVTTLLEIAQGFQYPAKLSDGWTGNDACSG  
WDFVTCDPQKR VITVSLGKQGLTGTISPANLTSLKNLYLNDNNLTGSIPASLTQLTQLQTL  
SNNNL

>VFLRR-RLK234

KIGEGGFGSVYKGVLPNGMEIAVKQLSSKSKQGTREFVNEVGTIFALQHPNLVKLLGCCTEDN  
QLLLVYEYMENNSLAHALFGSEELRLKLKWPIRFKICLGIAGLAFLHEESKLKVVHRDIKPTN  
VLDDKDLNAKISDFGLAKLYEAEKTHIITRIAGTTGYMAPEYAMRGYLTNKADVYSFGVVALEI  
VSGKNGTSYRPNDES VYLLDLAYVLQEKGDLLSLVDPMLGCDYSVKQAMTILDLAMLCTNPS  
PTLRPTMSEVVNVLEG

>VFLRR-RLK240

EVRILGALQHSCIVELYGHQISSKWPSEEGKPERQILQSAILMEYVKGGSLKSYIEKASKTGEK  
HVPVELALCIARDVAYALAEHLSKHIIHRDVKSENILIDVENKRADGMPVVKLCDFDRAVPLRS  
FLHTCCITHRGVPPPDVCVGTTPRWMAPEVLQAMHKRSLYGLEVDIWSYGCLLLELLTLQVPYS  
GLSEFHINELLQTGKRPPLTKELETASMNEPATTQPGSNLAGAEAESETLRFLVDLFHRCTEGN  
PANRPTAAEIYELL

>VFLRR-RLK241

IGGGGFGVVYRGVLRDGTQVAIKCLSAESKQKGHEFMTEIKIISYIRHPNLVELVGCCVEGSNRI  
LVYEYMENNSLATSLLGSKGKHIAMDWSKRAAICLTATGLAFLHEGIEPPIVHRDIKASNILLD  
GNLQPKIGDFGLAKLFPDNVTHVTTRVAGTVGYLAPEYALLGQLTKKADVYSFGVLLLEIISGR  
SSSKAAFGVDLLVLVEWTWKLREEGRLLLELVDPELPEYPEDEV MRFIKVALFCTQAAGRQRP  
MKQVVEMLSK

>VFLRR-RLK242

IGSFSYGT VYKGTLSGVEIAVTSTTVISRKEWSKILEAQFRKKIDTL SKMNHKNFVN  
LIGYCEE  
NEPFTRIMVFEYAPNGTLFEHLHIKEAEHLDWGMRLRIAMGMAYCLEYMHQLTPPIVHDNLQS  
SSIYLTEDYAAKISDFS YWNDVTTKIASIELIKPSSEYPESNVYSFGLILYEMITGRIPY

>VFLRR-RLK243

IGKGGFGTVYRGVLPDGRQVAVKKLQREGIEGEREFRAEMEVLSGNGFGWPHPNLVTLYGWC  
LDGSEKILVYEYMEGGSLDLVSDRMRLTWKKRIDIAIDVARALVFLHHECYPAIVHRDVKASN  
VLLDKDGKARVTDGLARFVDAGDSHVSTMVAGTVGYVAPEYGQTWQATTKGDVYSFGVLA  
MELATGRRAVDGGEECLVEWARRVIGNARNGLGRAVIPVVLGSGLAEGAVEMCELLRIGIRCI  
AETPQARPNMKE

>VFLRR-RLK244

LIGSGGFGGEVYKAQLKDGCVVAIKKLIHVTGQGDREFMAEMETIGKIKHRNLVPLLGYCKVGD  
ERLLVYEYMKWGSLEAVLHDRSKGGCSRLDWAARKKIAIGSARGLAFLHHSCIPHIHRDMKS  
SNVLLDENFEARVSDFGMARLVNALDTHLSVSTLAGTPGYVPPEYYQSFRCTTKGDVYSYGV  
LLELLSGKKTIDPSEFGDDNNLVGWAKQLHREKRSDEILDPELTAQKSFEAELHQYLRSFECLD  
DRPFKRPTMIQVMAMFKE

>VFLRR-RLK245

EVLGSGGFGKVYRAVLPSDGTVVAVKCLAEKGGEQFEKTFAAELVAVAHLRHRNLVRLRGWCV  
HEDQLLLVYDYMPNLSLDRVLFRRPENLTATPLDWERRRKIIGGLAAALHYLHEQLETQIIHRD  
VKTSNVMLDSHYNARLGDFGLARWLEHELEYQTRMPSPMRNHQFRLADSTRIGGTIGYLPPE  
FQKRSVATAKSDVFSFGIVVLEVVSRRRAVDLTYPDDKIILLDWVRRLSDEGKLLQAGDNRLPD  
GSYALSDMEQLIHLGLLCTLHIPQLRPNMKWIVETLVA

>VFLRR-RLK246

IGKGGFGTVYRGVLPDGRQVAVKKLQREGIEGEREFRAEMEVLSGNGFGWPHPNLVTLYGWC  
LDGSEKILVYEYMEGGSLDLVSDRMGLTWKKRIDIAIDVARALVFLHHECYPAIVHRDVKASN  
VLLDKDGKARVTDGLARFVDAGDSHVSTMVAGTVGYVAPEYGQTWQATTKGDVYSFGVLA  
MELATGRRAVDGGEECLVEWARRVIGNARNGLGRAVIPVVLGSGLAEGAVEMCELLRIGIRCI  
AETPQARPNMKEVLAMLIKI

>VFLRR-RLK248

QLGEGGYGPVYKGTLS DGRKVAVKLLSLASNQKGSEFVTEIATISAVQHRNLVKLYGCCIEG  
NRLLVYEYLENKS LDKALFATCAGKASLHLDWPTRFDICLTARGLAYLHEESRPRIVHRD  
VKASNILLDAELCPKISDFGLAKLYDEKKTHISTRVAGTIGYMAPEYAMRGHLTEKADV  
FSFGVLAL EILSGIPNYENNLVEEKIYLLGWAWTLYEKNQSLALVDP  
SLMGFDENEALRVL RVAL LCTQASP TVRPTMSRVVAML

>VFLRR-RLK249

VGQGGYGKVYKGILADGTVVAIKRAQEHS LQGEKEFLTEIELLSRLHHRNLVSLTGYCDEEGE  
QMLVYEFMPNGTLRDHLSAKSKVPLSFATRLRTALGSAKGILYLHTEADPPIFHRDIKASNILL  
D SNFNAKVADFGLSRLAPVPDDEGAAPAHVSTVVKGTPGYLDPEYFLTHKLTDKSDVYSLGVVF  
LELLTGMQAISHGKNIVRENVSYQSGMIFSVIDGRMGSPSDCVEKFLNLAMKCKCDETDAR  
PSMADV VRELETI

>VFLRR-RLK250

VGHGSGTVYKIELSNGEVVAVKRLWSKRTKDSSSEDQLLLDKNLKA EVGTLGSIRHKNIVKL  
YCYFSSLNCSLLVYEYMSNGNLWDALHKNKIYLDWPTRHQIALGVAQGLAYLHHDLLSPIIHR  
DIKSTNILLDVNYQPKVADFGIAKVLQARAGKDSTTTIVAGTYGYMAPEYAYSSKATTKCDVY  
SFGIVLMELITGKKPIHADFGENKNIVYWVSAKVDTKEGVMEVLDKRLSGSFRDEMIQVLR  
IAI RCTCNTPALRPTMNEVVQLLID

>VFLRR-RLK251

QVGQGGYGKVYKGILADGTVVAIKRAQEHS LQGEKEFLTEIELLSRLHHRNLVSLTGYCDEEG  
EQMLVYEFMPNGTLRDHLSAKSKVPLSFATRLRTALGSAKGILYLHTEADPPIFHRDIKASNILL

DSNFNAKVADFGLSRLAPVPDDEGAAPAHVSTVVKGTPGYLDPEYFLTHKLTDKSDVYSLGV  
VFLELLTGMQAISHGKNIVRENVVSYQSGMIFSVIDGRMGSYPSDCVEKFLNLAMKCKDETD  
ARPSMADVRELETI

>VFLRR-RLK252

KTRFSTYYKATMPSGASYFVKKLNWSDKIFQLGSHDKFDQELEVLGKLSNSNVMTPPLAYVLT  
VDSAYLFYEHAQKGTFLFDVLHGKLGNALDWGSRYSIAVGVAQGLTFLHGYTSGPILLDLSSR  
NILLKSLKEPLVGDIELYKVIDPTKSTGSLSTVAGSVGYIPPEYAYTMRVTMAGNVYSFGVVLE  
LLTGKPAVSEGTELAKWVSSNSAQKDRWDHILDFSISRTSLAVRGQMLAMLKVALSCVSLSPEA  
RPKMKSVLRFMI

>VFLRR-RLK254

EIGKGHIGIVYKAGMPFNVTFAVKKISPQKKQKEKDKIQREIFNLLSLRHENLVQLLGSCSRKG  
HHILYIYEMENGSLHQALFEPDSTIELDWKARYDICLGIAGLKYLHEDKRFEIVHGNITARNIL  
LDKNHTPKISDFGLARFRDDEDAFTTIKTRGERLYVAPEYFLGKAITVKADVYSYGVVVLEIVS  
GRTSMEQRPNQEYDVLLDAACVLHARGKILDLVDKKLSSSYDRKQALILLDTAICINSQSPTL  
RPKMSDVVSSL

>VFLRR-RLK255

LGAGGFGAVYKGTLDGTIIAVKQLSSRSKQGNREFLNEIGMISVLQHPNLVRLYGCCVEGNQL  
LLVYIYEMENSLAHVLFDAEESQSKLDWATRQRICVGIAGLAFLHEESALKIVHRDIKTANIL  
LDGDLNPKISDFGLAKL

>VFLRR-RLK256

EIGRGRFGIVYKAEMPDQTKLAVKKISPESTQDKLKDELQGEIFFNVKSLEHENLIQLFDGYSK  
KDLHLLIYIYEMENGSLDQALFEPKSRIELNWEVRFNICLGLAKALKYLHEENVRKIIHRNIKAS  
NILLDENYTAKLTDFGLASFDNEDDPFKTIKAGGARAYFAPEYARGQAITDKADVYSFGVVTLE  
IFSGRSTENKSEAQKYLLDDACIFQARGKIDQLVDKKLANYDRKLVKILNLAIMCINPTADL  
RPTMSEVVSVL

>VFLRR-RLK257

IGNGGFGATYKAEISSGVLVAIKRLAVGRFQGVQQFHAEIKTLGRLHHPNLVTLIGYHASETEM  
FLIYNYPGGNLEKFIQERSTRAVDWRILHKIALDIARALAYLHDECIPRVLHRDVKPSNILLDD  
DFNAYLSDFGLARLLGTSETHATTGVAGTFGYVAPEYAMTCRVSDKADVYSYGVVLELLSDK  
KALDPSFSSYGNFNIVAWACMLLRQGRAKELFTAGLWDAGPHDDLVEVLHLAVVCTVDLLS  
TRPTMKQVVRRLKQL

>VFLRR-RLK258

IGEGGFGPVPFKGLLSDGTIIAVKQLSSKSKQGNREFVNEIGMISALQHPHLVKLYGCCIEGNQLL  
LVYIYEMENSLARALFGPEEHQLNLDWSTRHKICVGIARGLAFLHEESRLKIVHRDIKATNVLL  
DKYLNKISDFGLAKLDEEENTHISTRVAGTFGYMAPEYAMRGYLTDKADVYSFGIVALEIVSG  
RCNTSNRSNMKEECFYLLDWACVLKEKGNLLELVDPKLGKNYNKEQVMTMINVALLCTNVS  
PVVRPAMSSVVSMLLEG

>VFLRR-RLK260

EIGRGRFGIVYKAEMPDQTKLAVKKISPESTQDKLKDELQGEIFFNVKSLEHENLIQLFDGYSK  
KDLHLLIYIYEMENGSLDQALFEPKSRIELNWEVRFNICLGLAKALKYLHEENVRKIIHRNIKAS  
NILLDENYTAKLTDFGLASFDNEDDPFKTIKAGGARAYFAPEYARGQAITDKADVYSFGVVTLE  
IFSGRSTENKSEAQKYLLDDACIFQARGKIDQLVDKKLANYDRKLVKILNLAIMCINPTADL  
RPTMSEVVSVL

>VFLRR-RLK261



FDPANKIGEGGFGPVFKGLLSDGTIIAVKQLSSKSKQGNREFVNEIGMISALQHPLVLK  
YGCCIEGNQLLLVYEYEMENNSLARALFGPEEHQLNLDWSTRHKICVGIARGLAFLHEESR  
LKIVHRDIKATNVLLDKYLSKISDFGLAKLDEEENTHISTRVAGTFGYMAPEYAMRGYL  
TDKADVYSFGIVALEIVSGRCNTSNRSNMKEECFYLLDWACVLKEKGNLLELVDPKLGKN  
YNKEQVMTMINVALLCTNVSPVVRPAMSSVVSML

>VFLRR-RLK262

FNPANKLGAGGFGAVYKGTLDGTIIAVKQLSSRSKQGNREFLNEIGMISVLQHPNVVRL  
YGCCVERNQLLLVYEYEMENNSLEHALFGTEECLSKLDWPTRQRICIGIAKGLAFLHEESA  
LKIVHRDIKAANILLDRDLNPKISDFGLAKLDEEENTHISTR

>VFLRR-RLK266

HGHSGLFRGTLENGISVVIKRVDMQSIKKETYLLELDFFSKVSHPRLVPLLGHCLLENENEKFLI  
YKYMPNGDLSSSLYRKTSEEDGSLQSLDWITRLKIATGAAEGLSCLHHECTPIVHRDVQASSIL  
LDDKFEVRLGSLSEACPQEGDTHQSRITRLLRQPSSQSGASGSVTTTCAYDVYCFGKVLLELV  
TGKLGMSASSEAQKLEWLEQTLPIYSMEKELVTKIVDPSLIIDEDLLEEVMAMAIVARSCLNP  
KPSRRPPMRYILKALEN

>VFLRR-RLK269

KIGEGGFGPVYKGLLPDGTVIKQLSSKSSQGNREFLNEIGMISCLQHPNLVKLHGCCVEGNQ  
LLVYEYEMENNSLARALLGPEHSRIKLDWQTRQRICVGIARGLAFLHEESRLKIVHRDIKATNV  
LLDKHLNPKISDFGLAKLDTEEKTHISTRIAGTMGYMAPEYALWGYLTHKVDVYSFGIVALEIV  
SGKHNMESHGPNENFACLLDWACHLQQSGNLMELVDEKLGSDFKKKEAERMIKASLLCTNGSP  
SLRPSMSEVVNMLEG

>VFLRR-RLK270

HGSGDLFRGFLDGGSTIVVKKVNLPSLKESYMMEELEFSKYSHTRLVPFLGHCSSENDNEKLL  
VYKYPNADLASSLYRVSEFEDDNLSLDWITRLKIAIGAAEGLSYLHHECNPLVHRDIQASS  
ILLDDKFEVRLG

>VFLRR-RLK271

IGEGGFGPVYKGLLPDGTVIKQLSSKSSQGNREFLNEIGMISCLQHPNLVKLHGCCVEGNQL  
LLVYEYEMENNSLARALLGPEHSRIKLDWQTRQRICVGIARGLAFLHEESRLKIVHRDIKATNV  
LDKHLNPKISDFGLAKLDTEEKTHISTRIAGTMGYMAPEYALWGYLTHKVDVYSFGIVALEIVS  
GKHNMESHGPNENFACLLDWACHLQQSGNLMELVDEKLGSDFKKKEAERMIKASLLCTNGSPS  
LRPSMSEVVNMLEG

>VFLRR-RLK273

IGVGGYGIVYKVVLPTGRVVAVKKLHQSQNGEMDDFKAFKSEICVLMNIRHRNIVKLYGFCSH  
VKHSFLVYEFIERGSLRNVLSNEEQAMELDWFKRLNVVKGIANALAYMHHDCCPPIIHRDISSN  
NVLLDSEFEAHVSDFGTARLLMPDSSNWTSFAGTFGYTAPELAYTMAVNEKCDVYSFGVVTL  
IIMGRHPGDFISSLSLSSSLTLPIDQHTLEDVIDQRLPFPRNKAANGLIHTIKLALACLSANPQSR  
PTMRQVSSQL

>VFLRR-RLK274

IGKDGRFGIYKAELSNLTVAVKKLFPQSKAVAQIGTEVYAKTFKLEHDNLVQLLATYSRKDLHL  
LIYEYMGYGSLEKALFDPKSSIQLSWEDRYSICLQIAQGLEYLHAKNPPIIHRNIKASNVLLDET  
CKAKISDFGLAKLYEEDDPFRFIEESGTRMYMAPEYATRKAVTMGIDVYSFGVLLLEIISGIKND  
ENLSEHHDQTIFLLEKVANLHVMVKDAKLQYKKVKYAEVLDDKISNLNYSKEEVVTIVDLAM  
LCTDQMVSLRPTISDVTSVLKG

>VFLRR-RLK275

KLGEGGFVPVYKGILNDGRVIAVKQLSVASHQGKSQFVTEIATISAVQHRNLVKLYGCCIEGYN  
RLLVYEYLENKSLDQALFGETSLNLDWPTRYQICLGVARGLAYLHEESRLRIVHRDVKASNILL  
DSELIPKISDFGLAKLYDDKKTHISTRVAGTIGYLAPEYAMRGHLTEKADVFAFGVVALEVISGR  
PNSDSSLEEEKIYLLEWAWNLHENNREVELVDSKLSDFSEEDVKRLIGVALLCTQTSPNLRPSM  
SRVIAML

Amino acid sequences of RLK domain from *V. Montana*

>VMLRR-RLK5

LGKGGFGTVYHGSLDDTEVAVKMLSPSSVQGYKQFQAEVKLLLRVHHRNLTTLVGFCNEDTY  
MGLIYEYMANGDLENLLSGSNRNVLRWDMRLQIVVEAAKGLEYLHSGSKPPIVHRDVKTANI  
LLNDKFQAKLADFGLSRSFP

>VMLRR-RLK8

VYRVETPLKQVIAVKKLWPVKNGEIPERDWFSAEVRTLGSRHKNIVRLLGCCNNGKTRLLLLFD  
YISNGSLAGLLHEKKLFLDWDARYNII LGAAHGLEYLHHDCPPPIVHRDIKANNILVGPQFEAF  
LADFGGLAKLVDSAECRSVSNTVAGSYGYIAPEYGYSFRITEKSDVYSYGVVLLLEVLTGENQLIL  
RFLKELRERKRDFTTILDQQLLLRSGTQLQEMQLVGLVALLCVNPSPEERPTMKDVTALLKEI

>VMLRR-RLK11

IGGGSIGTVYRTNFEGGISIAVKKLETLGIRRSQDEFEQEIGRLGNLRHPNLVSFQGYWSSSMQ  
LILSEFVPNGNLYDNLHGLDYPGTSTGVGNSELYWSRRFQIALGTARALSYLHHDCRPPILHLNI  
KSTNILLDENYEAKLSDYGL

>VMLRR-RLK14

QEAARELEYLGRIKHPNLVPLTGFCIAGDQRIAIYDYMENGNLQNLHDLPLGVQATEDWSTD  
TWEEDDNNGIQNVGSEGLTTWRFRHKIALGIARALAFLLHHCSPPIHRDVKASSVYLDYNL  
EPRVSDFGLAKIFGNGLDEEIARGSPGYVPPEFSDPDNNSPTPKSDVYCFGVVLFELITGKKPVG  
DDYPEEKEATLVSWVRGMVRKNQGSRTIDPKIRDTGPEYEMEETLKIGYLCTADIPSKRPSMQ  
QIVGLLKDI

>VMLRR-RLK15

IGRGGAGIVYKGIMPNGEQVAVKKLLGISKGSSHDNGLSAEIQTGKIRHRNI

>VMLRR-RLK47

FSIRNLIGTGGFGSTYKAELAPGYLVAVKRLSLGRFQGIQQFDAEIRTLGRIRHKNLVTLIGYYV  
GEAEMFLIYNYSGGNLETFIHERSSKNVQWSVIYKIAFDIAQALAYLHYSVCVPRILHRDIKPSN  
ILLDEELNAYLSDFGLAKLLEVSQTHATTDVAGTF

>VMLRR-RLK48

KIGEGGFSGVYKGRDKGKITAIVLSAESRQGVKEFLTEINVISEIEHENLVKLYGCCVEGNHR  
ILVYNFLENNSLAQTLLGVGNSYSNIQFSWRTRSICIGVARGLAFLHEDLRPHIVHRDIKASNIL  
LDKDLSPKISDFGLAKLIPPNMTHVSTRVAGTIGYLAPEYAIRGQLTRKADIYSFGVLLVEIVSGR  
CNTNTRLPIEEQYLLERTWELYERKELVGLVDTALDGDGDAEEACKFLKIGLLCTQDAPKLRPS  
MSTVVKLLTG

>VMLRR-RLK51

IGKGGFGSVYKAVLSTGQVVAVKKLNISDSSDIPAINLQSFENEIRMLTEVRHRNIIKLYGYCSRR  
GCLHLVYEYVERGSLGKVLYGVEGEIDLGWATRVKIVQGVAHAIAYLHHDCSPPIVHRDISMN  
NILLESDFEPRLSDFGTARLLNADSSNWTAVAGSYGYMAPELALTMRVTDKCDVYSFGVVALE  
VMMGRHPGELLSSISSPKPSMSNDPDLFLKDVLQRLPSPTGQLAEVVFVVQVAIACTRTTPE  
ERPAMRFMAQEL

>VMLRR-RLK55

LGRSSHGTSYRATLDNGMFLTVKWLREGVAKQKKEFAKEAKKFANIRHPNVVGLRGYYWGP  
TQHEKLILSDYISPGSLASFLYDRPGRKGPPPLTWVQRLKIAVDVARGLNLYLHFDRAVPHGNLKA  
TNILLDGPDLNARVADYCLHRLMTQAGTIEQILDAGVLGYRAPELAASKKPLPSFKSDVYA  
FGVILLELLTGRCAGDVISGEEGGVDLTDWVRLRVTEGRGSDCFDPALMPEMSNAVEKGMKEVL  
GLALRCIRSVSERP

>VMLRR-RLK56

IGSGGFGATYKAEIVPGVVAVKRLSVGRFQGVQQFATEIRTLGRVQHPNLVKLIGYHLSETEM  
FLIYNYLPGGNLETFIQERSRRVVEWSMLHKIALDIARALAYLHDECVPRVLHRDIKPSNILLDN  
NFNAYLSDFGLARLLGTSETHATTDVAGTFGYVAPEYAMTCRVSDKADVYSYGVVLELISDK  
KALDPSFSSFGNGFNIVAWASMLLRQGRASEFFTAGLWDSGPHNDLIQILHLGIMCTGESLSSRP  
SMKQVAQRLKRI

>VMLRR-RLK59

YKAVLEDGTALAVRRIGENHVERFRDFETQVRVIAKLVHPNLVRIRGFYWGVDEKLIHYDFVPN  
GSLSNARYRKVGSSPCHLPWEARLKIAGVARGLSFLHEKKHVHGNLKP SNILLGSDMEPRIG  
DFGLERLVTGDSSHKSSGSTRNFGSKRSTASRDSFQDFPLGPSPPSPSSIGGLSPYHAPESLSIK  
PNPKWDVYSFGVILLELLTGKVIVVDELGQGNGLVDDKNRAMRMADV AIRADVDGKEESL  
LACFKL

>VMLRR-RLK60

LGRGRSGIVYMTPLPSGSTVAVKRFKTMDKFSAAAFSSEIATLARIRHRNIVRLLGWGANRKT  
LLFYDYMSNGTLGALLHEGSIVGLVEWETRFKIALGVAEGLAYLHHDCVPILHRDVKAHNIL  
LGDRYEACLA DFLARLVEDDQGSFSATPQFAGSYGYIAPEYACMLKITEKSDVYSYGVVLEI  
ITGKKPVDPSFAEGQHVIQWVREQLKSKKDPVEILDPKLQGH PDTQIQEMLQALGISLLCTSNR  
AEDRPTMKDVAALLREI

>VMLRR-RLK64

LSRTRYGLVFKACYNDGMVLSIRRLPDGLMDENMFRKEAEFLSKVKHRNLTVLRGYYAGQQQ  
DLRLVVYDYMPNGNLATLLQEASHQDGHVLNWP MRHLIALGIARGLAFLHTSNMVHGDVKP  
QNVLFDA DFEAHLSDFGLDRLTIATPAEASSSTTVGTLGYVSPEAILTGEVSKESDVYSFGIVLLE  
LLTGKRPVMFNEDEDIVKWVKKQLQRGQITELLEPG LLELDPESEWEEFLLGVKVGLLCTAP  
DPLDRPTMSDIVFMLEG

>VMLRR-RLK66

GTAYRAKFQDGDIALVKEVKDLSQEKDV FIRQVQLLGRLHHRHLLALKGFSTGHKRLLVFDNI  
ENGSLKEHLNDPLRTPLNWKTRLRIAIGVVALEYLLLFSNPPMYHVSISSSNIMLDENFTAKLS  
NVGLLSSIENYVTMPQASCAEDCMNQNCGN IIFQLGV LILELITQSSEKGSTDLVQWIQGSRF  
GSSIQKMIDPDLGNSYDSRELKNLLAVARLCIKSGDKPKFSIPQIFRYLQK

>VMLRR-RLK67

LGRSSHGTSYRATLDNGMFLTVKWLREGVAKQKKEFAKEAKKFANIRHPNVVGLRGYYWGP  
TQHEKLILSDYISPGSLASFLYDRPGRKGPPPLTWVQRLKIAVDVARGLNLYLHFDRAVPHGNLKA  
TNILLDGPDLNARVADYCLHRLMTQAGTIEQILDAGVLGYRAPELAASKKPLPSFKSDVYA  
FGVILLELLTGRCAGDVISGEEGGVDLTDWVRLRVTEGRGSDCFDPALMPEMSNAVEKGMKEVL  
GLALRCIRSVSERP

>VMLRR-RLK70

VISRGKKGVLYKGSILLSDMQFMVKEINDLNSIPSNFWPEVSEFGKVKHPNIVKLIGMCRSDK  
GGFLVYEHVEGKDLSEILRNLSWERRRKIAIGIAKALRYLHGYCSPSIIVGHMSPEKILVDGKDE

PRLRLSLPDLLCIDTKCFISSAYVAPETRDSNDINEKSDMYGFGILILIELLTGKAPGDREFGVHESI  
VEWARYCYSDCHLDTWIDEMIKAEALMNQNEIVETMNLALHCTATDPKARPCAIDMFKTLN  
>VMLRR-RLK74

IGRGGQGSVYKAILPSGDIFAVKRLHPSEDNVSSDEYQMKTFKSEMYSLTEIRHRNIVKMHGFS  
YLNGLSYFVYEFARGGSLGEWLQEEKKAKILNWDLRKVIKGVANALSYLHHDCTPAVVHRDI  
SGSNILLDAEFEAKISDFGTARVLKKSESNNWTVPVGSYGYIAPELASTIKVTEKCDVYSFGVVAL  
EVILGKHPHELLLCLQSGGYDMLFSYILDKRLAPPTGPIVQELVLAVTLALLCIRENPKSRPTMH  
QVSSEL

>VMLRR-RLK77

ILGATGASIVYKAVLADGTAFARRIGESGVERFRDFENQVRIIAKLHPNLVKVRGFYWGND  
KLVLYDYVSNGLASSNYKKPGSSPFHLPLEVRFKIARGLARGLAFIHEKKHVHGSIKPSNILLN  
FDMEPIISDFGLDRLVLGNNSYKASNSGRNFGSQRSNSTPQEHPIASPYATPSSSSSTTITSPYQA  
PESLKSLLKPNPKWDVYAFGVILLELLTGRVVSRELSQWTAGLIVEDKDRVLRADVAIRVDVE  
AKEDAMLACFKLGFSCVSFVPQKRPSMKEAVQVLEKI

>VMLRR-RLK78

LGKSNFSATYKGILDRSVVVVKCITKTSCKSDEADFLKGLKILTSFKHENLVRLRGFCCSKGR  
GECFLIYDFVPNGNLLEYLDVKEGSGRVLEWSTRISIINGIAKGIGYLHGNGKNGKSALFHQNISA  
EKVLIDRRHNPLSDSGLHKILADDIIFSMLKASAAMGYLAPEYTTTGRFTEKSDVYAFGMILLQ  
ILSGKSNVTPLTRHAVESCKVEDFIDANLERNFPGSEAAKLGRLLALLCTHESPNHRPAMETVLQ  
ELSGF

>VMLRR-RLK81

IGQGGFGSVYRGILDRDGGKLVAVKVLNLQQHGASKSFIAECKALRNIRHRNLVKILTYCSSIDF  
KGNDFKALVFDFMENGSLDTWLYQEGNGNTQVQNLNFLRRLHIAIDVSFALLYLHDDCEAPVI  
HCDLKPSNILLDNEMTAHVGDVGLSKLLSKTINNSSQGETSSIGIKGTIGYMAPEYGGIGSEASAS  
GDVYSLGIILLEMFTGKKPTDEMFTSGLNLHNFVKAKIPGQVMQVVDPKLELGDNNVQKCIVS  
ILEIGLACSAEQVGERMNMVDVTRKLNII

>VMLRR-RLK86

NVIGTGSSGVVYKVTIPNGDSLAVKKMWSSEESGAFSSEIQTLSIRHKNIIRLLGWGSNQNLK  
LLFYDYLPNGSLSSLLHGAGKGGAEWETRYDIVLGVAHALAYLHHDCLPAILHGDVKAMNVL  
LGPSYEPYLADFGLARVVSSNSNDDLAKPSQRPHLAGSYGYMAPEHASMQRITEKSDVYSFG  
VVLLVLTGRHPLDPTLPGGAPLVQWVSDHLASKKDPVDILDHKLGRADPTMHMLQTLAV  
SFLCISTRADDRPTMKDIGAMLKEI

>VMLRR-RLK87

ILGQGGFGKVYKGVQLQDNTKVAVKRLTDFESPGGDAAFQREVEMISVAVHKNLLRLIGFCTTPS  
ERLLVYPFMMNLSVAYRLRERKPEEAVLDWATRKKVALGAARGLEYLHEHCNPKIIHRDVKA  
ANVLLDEDFEAVVGDFGLAKLVDVRKTNVTTQVRGTMGHIAPEYLSTGKSSERTDVFGYGIM  
LLELVTGQRAIDFSRLEEEDDVLLLDHVKKLEREKRLDAIVDRNLNKNYNILEVEMMIQVALL  
CTQASPEDRPAMSDVVRMLEG

>VMLRR-RLK90

LGRGRSGIVYMTPLPSGSTVAVKRFTMDKFSAAAFSSEIATLARIRHRNIVRLLGWGANRKT  
LLFYDYMSNGTLGALLHEGSIVGLVEWETRFKIALGVAEGLAYLHHDCVPILHRDVKAHNIL  
LGDRYEACLADFGLARLVEDDQGSFSATPQFAGSYGYIAPEYA

>VMLRR-RLK97

IGSGGFGATYKAEIVPGVVAVKRLSVGRFQGVQQFATEIRTLGRVQHPNLVKLIGYHLSETEM  
FLIYNYLPGGNLETFIQERSRRVVEWSMLHKIALDIARALAYLHDECVPRVLHRDIKPSNILLDN  
NFNAYLSDFGLARLLGTSETHATTDVAGTFGYVAPEYAMTCRVSDKADVYSYGVVLELISDK  
KALDPSFSSFGNGFNIVAWASMLLRQGRASEFFTAGLWDSGPHNDLIQILHLGIMCTGESLSSRP  
SMKQVAQRLKRI

>VMLRR-RLK98

KNILGAGGFGNVYKGKLGDMVAVKRLKDVSGNAGESQFRTELEMISLAVHRNLLRLIGYC  
ATPNERLLVYPYMSNGSVASRLRGKPALDWNTRKRIAIGAARGLLYLHEQCDPKIIHRDVKAA  
NVLLDDFCEAVVGDFGLAKLLNHADSHVTTAVRGTVGHIAPEYLSTGQSSEKTDVFGFGILLIE  
LITGMRALEFGKTVNQKGAMLEWVKILQEKKVEELVDRELRSNYDLIEIGEMLQVALLCTQ  
YLPAPHRPKMSEV

>VMLRR-RLK99

FSNIIGSFSYGTVYKGTLSGSGVEIAVTSTTVISRKEWSKILEAQFRKKIDTL SKMNHKNFVNIGY  
CEENEPFTRIMVFEYAPNGTLFEHLHIKEAEHLDWGMRLRIAMGMAYCLEYMHQLTPPIVHDN  
LQSSSIYLTEDYAAKISDFS YWNDVTTKIASIELIKPSSEYPESNVYSFGLILYEMITGRIPYTVEK  
CSLTDWTS DILRGQQSLEGMVDPTLKYFKQDELEKLVSVIKNCIHPDAKQRPKMSEVVAKLKEI

>VMLRR-RLK101

LGRGGFGTVYKGTLSGRQVAVKTL SAQSKQGVREFLNEIDTISKVRHPNLVELLGCCIQETNR  
ILVYEYVENNSLDQALLGSKNSCIKLDWKKRSAICLGIARGLTYLHEELVPHIVHRDIKASNILL  
DKEFNPKIGDFGLAKLFPDNITHISTRIAGTTGYLAPEYALGGQLTLKADVYSFGVLILEIISGRS  
SVKASWGETQKLLLEWAWQLHEEGKHLELVDPELGEFSEEEVIRHMKVAFFCTQGAANRRPL  
MSQVVDMLSK

>VMLRR-RLK103

IGQGSFGSVYKGSVLKLEDRLVAIKVLNLEQHGASKTFITECKTLSKIQHRNL

>VMLRR-RLK104

LGKSNFSATYKGILRDRSVVVVKCITKTSCKSDEADFLKGLKILTSFKHENLVRLRGFCCSKGR  
GECFLIYDFVPNGNLLEYLDVKEGSGRVLEWSTRISIINGIAKGIGYLHGNGKNKSALFHQNISA  
EKVLIDRRYNPLSDSGLHKILADDIIFSMLKASAAMGYLAPEYTTTGRFTEKSDVYAFGMILQ  
ILSGKSNVTPLTRHAVESCKVEDFIDANLERNFPGSEAAKLGRLLALLCTHESPNHRPAMETVLQ  
ELSGF

>VMLRR-RLK106

CIGVGAHGNVYKAQLSINKIVALKKLHHSKTENLVNEVEVLTRIRHK NIVKLYGFCLHRRSMFL  
IYEYMEKGS LFHALRNDTEAMELNWNIRVKI IKDIAFAVSYLHHGCNPPIVHRDISSKNILLNLE  
LKAFVSDFGLARLLDPDSSNQTTMAGTYGYMAPELAYTIVMTEKCDVYSFGVVALELLMGTH  
PGEFLSSSLTQNMIMNELLD SRLAPPSNDIDVQDIIFVATIAFSCLCATPKSRPTMEFLSQDFL

>VMLRR-RLK108

ILGATGASIVYKAVLADGTAFARRIGESGVERFRDFENQVR IIAKL RHPNLVKVRGFYWGND E  
KLVLYDYVSNGSLASSNYKKPGSSPFHLPLEVRFKIARGLARGLAFIHEKKHVHGSIKPSNILLN  
FDMEPIISDFGLDRLVLGNNSYKASNSGRNFGSQRSNSTPQEHPI TASPYATPSSSSSTTITSPYQA  
PESLSKSLKPNPKWDVYAFGVILLELLTGRVVS DRELSQWTAGLIVEDKNRVLRLADVAIRVNVE  
AKEDAMLACFKLGFSCVSFVPQKRPSMKEAVQVLEKI

>VMLRR-RLK114

NLIGEGGCSNVYKGCLRKCKPVAIKVLKQYKEAWNDFSFEVDIMSSLKHKNITHLIGVCIEDDH  
LILVYDFLSKGSLEERLQVRFKVAIAVAEALNYLHNGCSRSVIHRDVKSSNILLSSDFQPQLSDF

GLAIWGPEDAAYTISSDIVGTFGYIAPEYFMHGRVSDKIDIYSFGIVLLELLTGKKPISSKGLKGQ  
EILVMWAMPMLSEGNLEALVDPNLGNEFDIVQMHKMLAATLCIKQSPKLRPKASQILKLL

>VMLRR-RLK118

FSPDNLIGISFGSVYKGILDREGIVIAVKVLNLTRHGASKSFAAECETLRNIRHRNLVKVLTACS  
GVDYHGNDFKALVYDFMANGSLDGWLHPTIGLDETPKTLNVLQRLNIAIDVACALEYLHYHC  
GTPVIHCDLKPSNILLDENMTGHVSDFGVLKFLSNETLDNFINQFSSIGVRGTIGYCPPEYGIGSE  
VSTFGDIFSFGILLEMF TGKRPIDDMFKESLNLHSFVKRALPDQVTQVIDPSL

>VMLRR-RLK122

LGRGGFGVVYKGELDDGT KIAVKRMEAGVISNKA FDEFQAEIAVLSKVRHRHLVSLLGYSIEG  
NERILVYEYMPQGALSKHLFWKSLKLEPLSWKRRLNIALDVARGVEYLHNLAHRSFIHRDLK  
SSNILLGDDFRAKVSDFGVLKLAPDGEKSVVTRLAGTFGYLAPEYAVTGKITTKADVFSFGVVL  
MELLTGMLALDEDRPEESQYLA AWFWHIKSDKQKLRAAVDPALDVKDETFESISIIAELAGHCT  
AREPGQRPDMSHAVNVLAPL

>VMLRR-RLK128

LNEEHVIGFGGFGTVYK LAMDDGNVFALKRILKMNEGFDRFFERELEILGSIKHRYLVNLRGY  
CNSPTSKLLIYDYLPGGSLDEALHERSEQLDWDARLNIIMGAAKGLAYLHHDCSPRIIHRDIKSS  
NILLDGNLEARVSDFG LAKLLEDEESHITTIVAGTFGYLAPEYMQSGRATEKTDVYSFGVLVLE  
VLSGKRPTDASFIEKGLNIVGWLNFLVTENRPREIADPNCEGVQIESLDALLLVATQCVSSPED  
RPTMHRVVQILE

>VMLRR-RLK131

IGQGGFGSVYRGILDRDGGKLVAVKVLNLQQHGASKSFIAECKALRNIRHRNLVKILTYCSSIDF  
KALVDFDMENGSLDTWLYQEGNGNTQVQNLNFLRRLHIAIDVSFALLYLHDDCEAPVIHCDLK  
PSNILLDNEMTAHVGD FGLSKLLSKTINNSSQGETSSIGIKGTIGYMAPEYGIGSEASASGDVYS  
LGIILEMFTGKKPTDEMFTSGLNLHNFVKAKIPGQVMQVVDPKLELGDNNVQKCIVSILEIGL  
ACSAEQVGERMNM RDVTRKLNII

>VMLRR-RLK132

LGRGGFGTVYKGTLKSGRQVAVKTL SAQSKQGVREFLNEIDTISKVRHPNLVELLGCCIQUETNR  
ILVYEYVENNSLDQALLGSKNSCIKLDWKKRSAICLGIARGLTYLHEELVPHIVHRDIKASNILL  
DKEFNPKIGDFGLAKLFPDNITHISTRIAGTTGYLAPEYALGGQLTKADVYSFGVLILEIISGRS  
SVKASWGETQKLLLEWAWQLHEEGKHLELVDPELGEFSEEEVIRHMKVAFFCTQGAANRRPL  
MSQVVDMLSK

>VMLRR-RLK133

VLGEGSFGVFVKGWIDEDSLKAAVPGTGMAIAVKKLKPNGCQQQEWLAIEIKYLGHRLHSNL  
VKLIGYCIEDNQRLLVYEYMPYSSLDNHLFRRNSHFPLSWNLCKMVALGAARGLTFLHYEVD  
VIYRDFKTSNILLDANYNVKLSDLGLAKDGPIGRRTHVSTRALGTEGYGAPDYIRTGHILTAKSD  
VYSFGVVLLEMLCGRQAIDRNKPSEEQNLAKWARNVINARKIFQVLNPAIFGEHSGSSVLKVA  
QLAYQCVAEPKSRPNMKDVVQVLEEL

>VMLRR-RLK134

FEKKIGSGGFGVVYYGKMKDGKEIAVKVLT SNSFQGKREFSNEVTLLSRIHHRNLVQFLGFCQ  
DDGRSMLVYEFMHHGTLKEHLYGPLTHGRNINWIKRLEIAEDAAKGIEYLHTGCVPAIIHRDLK  
TSNILLDKHMRKAVSDFGLSKLAVDGVSHVSSIVRGTVGYLDPEYYISQQLTDKSDVYSFGVIL  
LELMSGQE AISNESFGVNCRNIVQWAKLHIESGDIQGIIDPSLNDEYDIQSMWKIAEKALMCVQ  
PHGHMRPSISEVLKEIQ

>VMLRR-RLK135

KNILGAGGFGNVYK GKLDGTMVAVKRLKDVS GNAGESQFRTELEMISLAVHRNLLRLIGYC  
ATPNERLLVYPYMSNGSVASRLRGK PALDWNTRKRIAIGAARGLLYLHEQCDPKIIHRDVKAA  
NVLLDDFCEAVVGDFGLAKLLNHADSHVTTAVRGTVGHIAPEYLSTGQSSEKTDVFGFGILLIE  
LITGMRALEFGKTVNQKGAMLEWVKILQEKKVEELVDRELRSNYDLIEIGEMLQVALLCTQ  
YLP AHRPKMSEV

>VMLRR-RLK136

FSNIIGSSQDSFVYKGT MKGGSEIAVISLCIKEEHWTGYLELYFQKEVADLARL NSENTGKLLGY  
CSESTPFTRMLVFEYASNGTLYEHLHYGEGCQLSWTRRMKIVIGIANGLKYLHTELDPPFTISEL  
NSSAVYLTDDFSAKLVDFESWKSILARSEKNSG SIGSQGAICLLPNSIEGRHLDVQGNVYA FGV  
LLEIISGRPPYCKDKGCLVDWAKEYLEMPEVMSYVVDPELKHFKYEDLKVICEVVSLCIHPEPA  
KRPSMEEISSILE

>VMLRR-RLK137

QLGEGGYGPVYKGTLS DGRKVAVKLLSLASSQ GKSEFVTEIATISAVQHRNLVKLYGCCIEG NR  
RLLVYEYLENKSLDKALFGKTS LHLDWPTRFDICLGTARGLAYLHEESRPRIVHRDVKASNILL  
DAELCPKISDFGLAKLYDEKKTHISTRVAGTIGYMAPEYAMRGHLTEKADVFSFGVL ALEILSGI  
PNYENNLVEEKIYLLGWAWTLYEKNQSLALVDP SLMDFDENEALRVLRVALLCTQASPTMRPT  
MSRVVAML

>VMLRR-RLK139

LNEEHVIGFGGFGTVYKLAMDDGNVFALKRILKMNEGFD RFFERELEILGSIKHRYLVNLRGY  
CNSPTSKLLIYDYLPGGSLDEALHERSEQLDWDARLNIIMGA AKGLAYLHHDCSPRIIHRDIKSS  
NILLDGNLEARVSDFGLAKLLEDEESHITTIVAGTFGYLAPEYMQSGRATEKTDVYSFGVLVLE  
VLSGKRPTDASFIEKGLNIVGWLNFLVTENRPREIADPNCEGVQIESLDALLVATQCVSSSPED  
RPTMHRVVQILE

>VMLRR-RLK140

IIGQGGFGKVYKGVLPDNTKVAIKRLTDYYSPGG EAAFQREVQLISVAVHRNLLRLIGFCTTSSE  
RILVYPYMRNLSVAYQLRELKPGEKGLDWPTRKRVAFGAAHGLEYLHEHCNLKIIHRDLKAAN  
ILLDDNFEAVLGD FGLAKLVDTKLTHVTTQIRGTMGHIAPEYLSTGKSSEKTDVFGYGITLLELV  
TGQRAIDL SRLEDEEDVLLLDHIKKLLREDRLDDIVDGNLKTYNRQEVKTIHQVALLSTQSSPED  
RPTMAEVVKLLQGV

>VMLRR-RLK141

IGKGGFGSVYKAVLSTGQVVAVKKLNISDSSDIPAINLQSFENEIRMLTEVRHRNIIKLYGYCSRR  
GCLHLVYEYVERGSLGKVLYGVEGEIDLGWATR

>VMLRR-RLK142

FSNVIGSSPIGTLYKGTLS SGVEIAVAKVAITSSKDWPKNLEVQFRKKIETLSKINHKNFVNLLGY  
CEEEEPFTRMLVFEYAPNGTLFEHLHIKESEHLDWGMRLRIAMGMAYCLEHMHQLNPPTTHSN  
LNSSAISLTEDYAAKISDFSFSNVVTATEAEATKKFLDTPTARPESNVYSFGVLLFEMVTGRVPY  
SVDNDSLEDWASY YLRGDQSLKNMVDPTLDSFEEEEKLEKIGEVIKSCVHPDPKQRTEMREVT A  
ILREI

>VMLRR-RLK144

IGVGSYGSVYRGILEQVEIEVAVKVINLQQRGASNSFISECQALGSIRHRNLLKLL

>VMLRR-RLK145

IGVGSYGSVYKGFLEQVGIEAAVKVLNLQRRGALKSFVSECQALRTIRHRNLLKLLNVCSSIDF  
EGNDFKALIYEFMEKGSLEEWLHAHNAGEDGQEREFGNLKLIDRVNIAIDIANAIEYLHNGSSS  
TIVHGDLPK

>VMLRR-RLK147

HFGKESLLSEGRCGPLYRAVLPGDVHVAIKVLENARGIDYEEAVTIFEGLSRLKHPNLLPLCGYC  
IAGKEKLVLYEFMANGDLHRWLHELPTLVPNVEDWSTDTWEHQNISGSHIFSPEEKTNWLTRH  
RIAIGVARGLAYLHHAGSIHGHVLASNILFSDTLEPRVADFGLRNISPKNKHIVENNGIEFDVYCF  
GVVLIELLTGKQGSEETVEWVRRRLVREGRGADALVPTLTVSGESVSEMVECLRVGYLCTAELP  
GKRPSMQQVLGLLKDI

>VMLRR-RLK148

IGASSLSTVYKQGLEDGQMVAVKKNLQQFPAESDKSFYREVKTLSQLRHKNLVKVLGYAWE  
SRKLKALVLEYMNNGSLESIIHDAHVDQSKWTLSQRIDVWISVASGLEYLHSGYDFPIVHCDLK  
PSNILLDSSWVAHVSDFGTARILGVHLQDGSSLSSSSAFQGTIGYLAPEFAYMRKVTTKVDVFSF  
GIIIMEFLTARRPTGLTEEHGIPISLSQLFEKALGNGINGLLQVLDPVIAMNASKDEQTLTELFKL  
ALCCTNPNPDDRPNMNEVLSSLNKL

>VMLRR-RLK153

KIGEGGFGSVYKGVLPNGMEIAVKQLSSKSKQGTREFVNEVGTIFALQHPNLVKLLGCCTEDN  
QLLLVYEYMENNSLAHALFGSEELRLKLNWPFRFKICLGIAGLAFLHEESKLKVVRDRIKPTN  
VLLDKDLNAKISDFGLAKLYEAEKTHVITRIAGTTGYMAPEYAMRGYLTNKADVVSFGVVALE  
IVSGKNGTSYRPNDESUYLLDLAYVLQEKGDLLSLVDPMLGYDYSVKQAMTILDLAMLCTNP  
SPTLRPTMSEVVNVLEG

>VMLRR-RLK154

GGFSEANLIKHGHSGLFRGFLDGGSTIVVKKVNFHSLKKESYMMELELSKYSHTRLVPLLG  
HSENDNEKLLVYKYPNADLANSLYRVSEFEDDNLQSLDWITRLKIAIGAAEGLSYLHHECN  
PPLVHRDIQASSILLDDKFEVRLGSLSEIRIQEGDSHHNVLTRFLRKPQSSEPGPSGSSSMTCSDH  
VYCFGKVLLELITGKLGISKSDDVTAREWLEHALGYISYDKELVTKIVDPSLIIDEDLLEEVWS  
MAIVARSCLNPKPSKRPLMKYILKALEN

>VMLRR-RLK155

IGSGGSGQVYKVKLKSGQIVAVKRLWGGNNKKPETESVFRSEVETLGRVRHGNIVKLLMCCSG  
EEFRILVYEYMEENGSLGDVLHGEKDGGMLMDWTERFAVAVGAAQGLAYLHHDCVPPIVHRDVK  
SNNILLDEEMRPKVADFGLAKTLQSDVGECDVMSRIAGSYGYIAPEYAYTLK

>VMLRR-RLK156

KVGEGGFGIVYKGVLDGTVAIAIKVLSPELRQGVREFLTEIKLIADVEHDNLVKLYGCCVEEDH  
RILVYGYLKNNSLAQTLLGGNRSSIQFNWPTRCRICIGVAQGLAFLHEEVRPHIVHRDIKASNIL  
LDENLMPKISDFGLAKLFPPNLTHISTRVAGTAGYLAPEYAIRGQLTRKADIYSFGVLLLEIVCGR  
SNTNRRLPPEEQYLLERVWDSHEKGELVSLVDASLNEDYDTEEACKYLKIGLLCTQDMPKLRP  
TMSTVVKMLMG

>VMLRR-RLK159

IGIGHFSSVYKGLKDGKEVAIKVFNVEEETSLRSFDLECEVFSRVSHPNLVRTVCISNSINFKAL  
VMEYMANGSLEKWLHCHKYDLILQRVDIMETAKAVRYLHQRCIIHCDIKPSNIILDEDMVAH  
VSDFSIAKIQPVSRIRTIQSKLMCTIGYVAPEYGRYGVVSASMDVYSFGILLMETFTGKKPTHEM  
FTGEMNLRRWVIESLPCEVERVIDPSLLQTEENNDVYMKCISSVMRLALICSAESPSERLNMR  
DVEEKLNNI

>VMLRR-RLK160

VGHGGSGTVYKIELSNGEVVAVKRLWSKRTKDSSSEDQLLLDKNLKAIEVGTLSIRHKNIVKL  
YCYFSSLNCSLLVYEYMSNGNLWDALHKNKIYLDWPTRHQIALGVAQGLAYLHHDLSPPIHR  
DIKSTNILLDVNYQPKVADFGIAKVLQARAGKDSSTTIVAGTYGYMAPEYAYSSKATTCKDVY



SFGIVLMELITGKKPIHADFGENKNIVYWVSAKVDTKEGVMEVLDKRLSGSFRDEMIQVLR  
IAIRCTCNTPALRPTMNEVVQLLID

>VMLRR-RLK161

LDEEDVVGSGGFGTVYRMVMNDCGTFVAVKRIDRSREGSDQVFERELEILGSIKHINLVNLRGY  
CRLPMAKLLIYDYLAMGSLDDILHEHVQEQLNWSARLSIALGSARGLAYLHHDCSPKIVHRD  
IKSSNILLDETLEPHVSDFGLAKLLVDEDAHVTTVVAGTFGYLAPEYLQSGRATEKSDVYSFGV  
LLELVTGKRPTDPAFVKRGLNVVGWLNTLLRENRLDDVVDKRCCKDADMETVEAILEIAARC  
TDANPDDRPTMNQVLQLE

>VMLRR-RLK163

KTRFSTYYKATMPSGASYFVKKLNWSDKIFQLGSHDKFDQEVLGKLSNSNVMTPPLAYVLT  
VDSAYLFYEHAQKGTFLFDVLHGKLGNALDWGSRYIAVGVAQGLTFLHGYSGPILLDLSSR  
NILLKSLKEPLVGDIELYKVIDPTKSTGSLSTVAGSVGYIPPEYAYTMRVTMAGNVYSFGVVLE  
LLTGKPAVSEGTELAKWVSSNSAQKDRWDHILDFSISRTSLAVRGQMLAMLKVALSCVSLSPEA  
RPKMKSVLRMI

>VMLRR-RLK165

LIGSQFGHVKGVQLQDNTRIAVKVLASKTTCGEISGSFKRECQVLKRARHRNLIITICSKPD  
FKALVPLMANGSLERYLYPSHGFLNPGDLIQLVSICCDVAEGVAYLHHYSPVRVHCDLKP  
SNILLDDMTALVTDFGIARLVKGIDDNDQNSTSTNNNDSVSFSSTDGLLCGSGYIAPEYGM  
GRRASTQGDVYSFGVLLLEILVGKRPTDVLFHEGSSLHEWVKSHYPRKLETIVEQTMVRWCA  
QISSMPSAYYIYDNKIWSDVIVELIELGLMCTQYNPSTRPTMLDVAHEMGR

>VMLRR-RLK166

FKEVIGRGSFGSVYLGKLSDGKPVAVKVRFDKQTLGADSFINEVYLLSQIRHQNLVCLLEGFCYE  
SKQQILVYEYLPGGSLAEHLYGLNSQKVSLSWVRRLKIAVDAAGLDYLNHGNPRIHRDVK  
CSNILLDKDMNAKVCDFGLSKQVMQADASHVTTVVKGKTAGYLDPEYYSTQQLTEKSDVYSF  
GVVLELICGREPLRHSGTPDSFNLVLWTTIVKMQAKPYLQAGAFEIVDDSIKGTDFVESMRKA  
ATVAVRSVERDASQRPNIAEVLAEKE

>VMLRR-RLK167

IGNGGFGLVYKGCLEDGSAVAIKVIDITQTGFQKSFLAECEALRNVRHRNLVKLITSCSSVDLKN  
TEFLALVYEFLGNGSLQDWIQGKRKNEDGDGLNLVERLNVAIDIASAIDYLHNDCEVPVHCD  
LKPNNILLDEDMTAKVGDFGLAKLLIEKMSDQTSISSTYALKGSIGYIPPEYGLGVKPSTAGDV  
YSFGVMLELFTGKSPTGDSFMVGQNLVGWVQSAPPADIEQVLDPELQSLMDNFSDSQTIKP  
EAQHYCLITILGIGLACTVASPDNRISIRNTLSKLQ

>VMLRR-RLK168

GGFSEANLIKHGHSGLFRGFLDGGSTIVVKKVNFHSLKKESYMMELELSKYSHTRLVPLLG  
HCSENDNEKLLVYKYPNADLANSLYRVSEFEDDNLQSLDWITRLKIAIGAAEGLSYLHHECN  
PPLVHRDIQASSILLDDKFEVRLGSLSEIRIQEGDSHHNVLTRFLRKPQSSEPGPSGSSSMTCSDH  
VYCFGKVLLELITGKLGISKSDDVTAREWLEHALGYISYDKELVTKIVDPSLIIDEDLLEEVWS  
MAIVARSCLNPKPSKRPLMKYILKALEN

>VMLRR-RLK170

IGKGHIGIVYKAGMPFNVTFVAVKKISPQTKQQEKDKIQREIFNLLSRHENLVQLLGSCSRKGH  
HILYIYEMENGLHQUALFEPDSTIELDWKARYDICLGIAGLKYLHEDKRFEIVHGNITARNILL  
DKNHTPKISDFGLARFRDDEDAFTTIKTRERLYVAPEYFLGKAITVKADVYSYGVVVLEIVSGR  
TSMEQRPNQEYDVLLDAACVLHARGKILDLVDKKLSSSYDRKQALILLDTAICINSQSPTLRP  
KMSDVFSAL

>VMLRR-RLK172

VGEGGFGSVYKGLSDGTAVKQLSSKSKQGNREFVNEIGMISALQHPNLVKLLGCCTEDNQ  
LLLVEYEMENNSLAHALFGSEELRLKLNWPFRFKICLGIAKGLAFLHEESKLVVHRDIKPTNV  
LLDKDLNAKISDFGLAKLYEAEKTHVITRIAGTTGYMAPEYAMRGYLTNKADVVSFGVVALEI  
VSGKNGTSYRPNDESUYLLDLAYVLQEKGDLLSLVDPMLGYDYSVKQAMTILDLAMLCTNPS  
PTLRPTMSEVVNVLEG

>VMLRR-RLK174

EVRLGALQHSCIVELYGHQISSKWVPSEEGKPERQILQSAILMEYVKGGSLKSYIEKASKTGEK  
HVPVELALCIARDVAYALAEHLSKHIIHRDVKSENILIDVENKRANGMPVVKLCDFDRAVPLRS  
FLHTCCITHRGVPPPDVCVGTTPRWMAPEVLQAMHKRSLYGLEVDIWSYGCLLLELLTLQVPYS  
GLSEFHINELLQTGKRPLTKETLASMNEPATTQPGSNLAGAEAESETLRFLVDLFHRCTEGN  
PANRPTAAEIYELL

>VMLRR-RLK175

IGNGGFGATYKAEISSGVLVAIKRLAVGRFQGVQQFHAEIKTLGRLHHPNLVTLIGYHASETEM  
FLIYNYLPG

>VMLRR-RLK176

VGQGGYGKVKYGILADGTVVAIKRAQEHSLQGEKEFLTEIELLSRLHHRNLVSLTGYCDEEGE  
QMLVYEFMPNGTLRDHLSAKSKVPLSFATRLRTALGSAKGILYLHTEADPPIFHRDIKASNILLD  
SNFNAKVADFGLSRLAPVPDDEGAAPAHVSTVVKGTPGYLDPEYFLTHKLTDKSDVYSLGVVF  
LELLTGMQAI SHGKNIVREVNVSYSQSGMIFSVIDGRMGSYPSDCVEKFLNLAMKCKCKDET DAR  
PSMADV VRELETI

>VMLRR-RLK179

IGKGSFGTVYYGQMKDGKEIAVKIMADSSSHLRQQFVTEVALLSRIHHRNLVPLIGFCEEEHQRI  
LVY EYMHNGTLRDHIHGLRTI

>VMLRR-RLK184

LGAGGFGAVYKGTLKDGTHAVKQLSSRSKQGNREFLNEIGMISVLQHPNLVRLYGCCVERNQL  
LLVY EYMENNSLAHALFDTEESQSKMDWATRQRICVGIAKGLAFLHEESALKIVHRDIKTANIL  
LDGDLNPKISDF

>VMLRR-RLK187

IGNGGFGATYKAEISPGTLVAVKKLALGRFQGVQQFHAEIKALGRVRHPNLVTLIGYHASEAEM  
FLIYNYLPGGNLE

>VMLRR-RLK192

IGVGGYGIVYKVVLPTGRVVAVKKLHQSQNGEMDDFKAFKSEICVLMNIRHRNIVKLYGFCSH  
VKHSFLVYEFIERGSLRNVL SNEEQAMELDWFKRLNVVKGIANALAYMHHDCCPPIIHRDISSN  
NVLLDSEFEAHVSDFGTARLLMPDSSNWT SFAGTFGYTAPELAYTMAVNEKCDVYSFGVVTLE  
IIMGRHPGDFISTLSLSSSSLSWPTDQHTLEDVIDQRLPFPRNKAANGLILNIKLALACLSANPQS  
RPTMRQVSSQL

>VMLRR-RLK194

IGVGKFGEVYKGLNDGMLVAIKKRPGAPSQEFVDEVRYLSPIQHRYLVTL LGFCQENNQQFLI  
YEYIPSGSVSSHLYGPSQVSDGKLEFKHRLSIALGAAGKDPLQNQFGSSSLFESPAKIDIMSSL  
MKVQNTQDYSVFSSIVDPRLGTSFTAEGMEEFIQLIVRCLEPSSERRPSMSYVVMELDRI

>VMLRR-RLK195

HGHSGLFRGTLENGISVVIKRVDMQSIKKETYLLELDDFFSKVSHPRLVPLLGHCLLENENEKFLI  
YKYPNGDLSSSLYRK TSEEDGSLQSLDWITRLKIATGAAEGLSCLHHECTPPIVHRDVQASSIL

LDDKFEVRLGSLSEACPQEGDTHQSRITRLLRLPQSSEQGASGSVTTTCAYDVYCFGKVLLELV  
TGKLGMSASSEAQLKEWLEQTLPYISMYEKELVTKIVDPSLIIDEDLLEEVWAMAIVARSCLNP  
KPSRRPPMRYILKALEN

>VMLRR-RLK197

IGVGGYGIVYKVVLPTGRVVAVKKLHQSQNGEMDDFKAFKSEICVLMNIRHRNIVKLYGFCSH  
VKHSFLVYEFIERGSLRNVLSNEEQAMELDWFKRLNVVKGIANALAYMHHDCCPPIIHRDISSN  
NVLLDSEFEAHVSDFGTARLLMPDSSNWTSFAGTFGYTAPELAYTMVNEKCDVYSFGVVTLE  
IIMGRHPGDFISTLSLSSSSLSWPTDQHTLEDVIDQRLPFPRNKAANGLILNIKLALACLSANPQS  
RPTMRQVSSQL

>VMLRR-RLK198

FNEINLLGRGSFGSVYKGTLQGGMNVAVKVFNQLQEEGFKSFDVECEVLCRIRHRNLVKIITAC  
CNIDFKALVLEFMPNWSLEKWLYSHNYFLDILQRLNIMVDVALALEYLHYGYTTPVVHCDLKP  
SNILLDEDMVGHVSDFGIAKLLGEEHSIIQTMTLATVGYMAPEYGLEGLVSIRGDMYSYGILM  
METFTRKKPTDEMFSSEMNMKQWVKESFSLPCGVTEIADANLLKSDGHFSAKKDCIASIMAL  
ALKCSADLPEERIDIKDAL

>VMLRR-RLK202

EIGRGRFGIVYKAEMPDQTKLAVKKISPESTQDKLKDELQGEIFFNVKSLEHENLIQLFDGYSK  
KDLHLLIYEYMENGSLDQALFEPKSRIELNWEVRFNICLGLAKALKYLHEENVRKIIHRNIKAS  
NILLDENYTAKLTDFGLASFDNEDDPFKTIKAGGARAYFAPEYARGQAITDKADVYSFGVVTLE  
IFSGRSC TENKSEAQKYLLDDACIFQARGKIDQLVDKKLANYDRKLVPKILNLAIMCINPTADL  
RPTMSEVVSVL

>VMLRR-RLK203

IGVGKFGVYKGLLNDGMLVAIKKRP GAPSQEFVDEDFKTANVLVDENFIAKVADAGLRNFLG  
RVDVAAKIDIMSSLMKVQNTQDYSVFSSIVDPRLGTSFTAEGMEEFIQLIVRCLEPSSERRPSMS  
YVVMELDRI

>VMLRR-RLK204

LGAGGFGAVYKGTLDGTIIAVKQLSSRSKQGNREFLNEIGMISVLQHPNLVRLYGCCVERNQL  
LLVYEY MENNSLAHALFDTEESQSKMDWATRQRICVGIAGLAFLHEESALKIVHRDIKTANIL  
LDGDLNPKISDF

>VMLRR-RLK205

IGVGSYGSVYRGILEQVEIEVAVKVINLQQRGASNSFISECQALGSIRHRNLLKLLSVCSSMDFE  
GNDFKALIYEFMANGSLEKWLVHVGQERNSTNLKLNRLNIAIDIAFAIEYLHNGSSSTIIHGDL  
KPSNVLLDEEMTAHIGDFGLAKIVSTISGEAMQFPSTSAIKGSIGYVAPEYGMGEPVSIEGDVY  
SYGILLLEMFTGKKPTDDYFKDELNLHTLVERSLPHKAMEIVDSSILSEDARGSFKEYCVISVLR  
IGVACSMELPAERIKMRD VISELEKI

>VMLRR-RLK207

FSSKMEIGRGRFGIVYKAEMPDQTKLAVKKISPESTQDKLKDELQGEIFFNVKSLEHENLIQLFD  
GYSKKDLHLLIYEYMENGSLDQALFEPKSRIELNWEVRFNICLGLAKALKYLHEENVRKIIHRN  
IKASNILLDENYTAKLTDFGLASFDNEDDPFKTIKAGGARAYFAPEYARGQAITDKADVYSFGV  
VTLEIFSGRSC TENKSEAQKYLLDDACIFQARGKIDQLVDKKLANYDRKLVPKILNLAIMCINPT  
ADLRPTMSEVVSVL

>VMLRR-RLK208

IGEGGFPGVYKGLLPDGTVIAVKQLSSKSSQGNREFLNEIGMISCLQHPNLVKLHGCCVEGNQL  
LLVYEY MENNSLARALLGPEHSRIKLDWQTRQRICVGIARGLAFLHEESRLKIVHRDIKATNVL

LDKHLNPKISDFGLAKLDTEEKTHISTRIAGTMGYMAPEYALWGYLTHKVDVYSFGIVALEIVS  
GKHNM SHGPENNFACLLDWACHLQQSGNLMELVDEKLGSDFKKKEAERMIKASLLCTNGSPS  
LRPSMSEVVNMLEG

>VMLRR-RLK209

IGEGGFPGPVFKGLLSDGTIIAVKQLSSKSKQGNREFVNEIGMISALQHPHLVKLYGCCIEGNQLL  
LVYEY MENNSLARALFGPEEHQLNLDWSTRHKICVGIARGLAFLHEESRLKIVHRDIKATNVLL  
DKYLN SKISDFGLAKLDEEENTHISTRVAGTFGYMAPEYAMRGYLTDKADVYSFGIVALEIVSG  
RCNTS NR SNMKEECFYLLDWACVLKEKGNLLELVDPKLGKNYNKEQVMTMINVALLCTNVS  
PVVRPAMSSVVS MLEG

>VMLRR-RLK210

IGEGGFPGPVYKGLLPDGTIVIAVKQLSSKSSQGNREFLNEIGMISCLQHPNLVKLHGCCVEGNQL  
LLVYEY MENNSLARALLGPEHSRIKLDWQTRQRICVGIARGLAFLHEESRLKIVHRDIKATNVL  
LDKHLNPKISDFGLAKLDTEEKTHISTRIAGTMGYMAPEYALWGYLTHKVDVYSFGIVALEIVS  
GKHNM SHGPENNFACLLDWACHLQQSGNLMELVDEKLGSDFKKKEAERMIKASLLCTNGSPS  
LRPSMSEVVNMLEG

>VMLRR-RLK212

LGRGSFGSVYKGT LQGGMNVAVKVFN LQEGGFKSFDVECEVLQRIRHRNLVKIITSCSSIDFR  
ALVLEFMPNWSLEKWLYSHNYFLDIMQRLNIMIDVALALEYLHYGSTTPVVHCDLKPSNILLD  
EDMVGHVSDFGI AKLLGEEHSIIQTMTLATVGYMAPEYGSEGLISIRGDMYSYGILVMETFTRK  
RPIDEMFTEEMSMKQWVRDSSLPCGVTEIADSNLLKRNEQHFS AKKDCIESILILAQKCCADL  
PDERIDIKDVFSTLKKI

>VMLRR-RLK213

IGNGGFGATYKAEISSGVLVAIKRLAVGRFQGVQQFHAEIKTLGRLHHPNLVTLIGYHASETEM  
FLIYNYPGGNLEKFIQGRSTRAVDWRILHKIALDIARALAYLHDQCVPRLVRDVKPSNILLD  
DDFNAYLSDFGLARLLGTSETHATTGVAGTFGYVAPEYAMTCRVSDKADVYSYGVVLELLSD  
KKALDPSFSSYGN GFNIVAWGCMLLRQGRAKEFFTAGLWDAGPHDDLVEVLHLAIVCTVDLSL  
TRPTMKQVVRRLKQL

>VMLRR-RLK215

IGEGGFPGPVYKGLLSDGTIIAVKQLSSKSKQGNREFVNEIGMISALQHPHLVKLYGCCIEGNQLL  
LVYEY MENNSLARALFGKSNKHNLFHFHDACTSEKYIIIAVFLCSLLIGDLKGYEEHQLNLDW  
STRHKICVGIARGLAFLHEESRLKIVHRDIKATNVLLDKYLN SKISDFGLAKLDEEENTHISTRV  
AGTFGYMAPEYAMRGYLTDKADVYSFGIVALEIVSGRCNTS NR SNMKEECFYLLDWACVLKE  
KGNLLELVDPKLGKNYNKEQVMTMINVALLCTNVS PVVRPAMSSVVS MLEG

>VMLRR-RLK216

IGKDGRFGIYKAELSNLTVAVKKLFPQSKAVAQIGTEVYAKTFKLEHDNLVQLLATYSRKDLHL  
LIYEYMDRGSLEQALFDPKPSMQLSWKTRY SICLQIAQGLEYLHAKNPPIIHRDIKASNILLDGS  
SKAKISDFGLAKLYEEDNPFMFIEEGGTRMYMAPEYATHKAVTVGVDVFSFGVLLLEIVTGIKN  
DENLSKHHDQTIFLLEK VANLHAMVKDAKLQYKKVKYAE LVDEKLLNSNYSEEEVVTIIDLA  
MLCTDQMASLRPIISDVVS VLEG

>VMLRR-RLK218

IGKGGYGT VYKANLP SGSTVAVKKLHPLGNGERPYQKEFLNEIRALTEIRHRNIVRLHGFCSYA  
SHSFLVYEYLEGGSLDAVLGNDKEAKELDWSKRVNIVKGVAQALSYMHHD CSPPIVHRDIKSK  
NILLDSEYEAHISDFGTAKLLNLDSSHW TALAGTYGYVAPEFAYTMK

>VMLRR-RLK220

IGKDGRFGIHYKAELSNLTVAVKKLFPQSKAVAQIGTEVYARTFKLVHDNLVQLLATYSRKDLHL  
LIYEYMDRGSLEQALFDPKPSMQLSWKTRYISICLQIAQGLEYLHAKNPPIIHRDIKASNILLDGS  
SKAKISDFGLAKLYEEDNPFMFIEEGGTRMYMAPEYATHKAVTVGVDFVFSFGVLLLEIVTGIKN  
DENLSKHHDQTIFLLEKVANLHAMVAKLQYKKVKYAEKVDEKLLNSNYSEEEVVTIIDLA  
MLCTDQMASLRPIISDVVSVLEG

>VMLRR-RLK221

KLGEGGFPGVYKILNDGRVIAVKQLSVASHQGKSQFVTEIATISAVQHRNLVKLYGCCIEGYN  
RLLVYEYLENKSLDQALFGETSLNLDWPTRYQICLGVARGLAYLHEESRLRIVHRDVKASNILL  
DSELIPKISDFGLAKLYDDKKTHISTRVAGTIGYLAPEYAMRGHLTEKADVFAFGVVVLEIISGRP  
NSDSSLEEEKIYLLAWNLHENNREVELVDSKLSDFSEEDVKRLIGVALLCTQTSPNLRPSMS  
RVIAML

>VMLRR-RLK222

KLGEGGFPGVYKILNDGRVIAVKQLSVASHQGKSQFVTEIATISAVQHRNLVKLYGCCIEGYN  
RLLVYEYLENKSLDQALFGETSLNLDWPTRYQICLGVARGLAYLHEESRLRIVHRDVKASNILL  
DSELIPKISDFGLAKLYDDKKTHISTRVAGTIGYLAPEYAMRGHLTEKADVFAFGVVVLEIISGRP  
NSDSSLEEEKIYLLAWNLHENNREVELVDSKLSDFNEQDVKSLIGVALLCTQTSPNLRPSMS  
RVIAML

>VMLRR-RLK225

FSTLNLIGVGTFGSVYKGTLEEDGVIIAVKVLNLQQGGAAKSFMAECKVLQNIHRHKNLLRIITS  
CSSIDFQGNDFKALIYEYMPNGNLEKWLHPSSEIYAEPIEQQLNLLQRMNIAIDVANALTYLH  
HSCQKPIIHCDLKPSNILLDNDMVAHIGDFGLAKFLSHFPNPVQSSSI

>VMLRR-RLK229

IGSGSGGTIYRAELHTGETVAVKRILWKDDFLLNKSFTREVKTGLGRIRHRHLVKLLGYCTNKGA  
GSNLLIYEMENGSVWDWLHQQPVNSKIKKSLDWEARLRIAVGLAQGVEYLHHDCVPTLIHR  
DIKSSNVLLDSSMEAHLGDFGLAKALVEDYDSYTESNSWFAGSY

>VMLRR-RLK237

IGSGSGGTIYRAELHTGETVAVKRILWKDDFLLNKSFTREVKTGLGRIRHRHLVKLLGYCTNKGA  
GSNLLIYEMENGSVWDWLHQQPVNSKIKKSLDWEARLRIAVGLAQGVEYLHHDCVPTLIHR  
DIKSSNVLLDSSMEAHLGDFGLAKALVEDYDSYTES

>VMLRR-RLK252

RLPDGLMDENMFRKEAEFLSKVKHRNLTVLRGGYAGQQDLRLVVYDYPNGNLATLLQEA  
SHQDGHVLNWPMRHLIALGIARGLAFLHTSNMVHGDVKPQNVLFDAADFEAHLSDFGDLRLTI  
ATPAEASSSTTVGTGLGYVSPEALITGEVSKESDVYSFGIVLLELLTGKRPVMFNEDEDIVKWVK  
KQLQRGQITELLEPGLELDPESEWEEFLLGVKVGLLCTAPDPLDRPTMSDIVFMLEG

Amino acid sequences of RLK domain from *A. thaliana*

>At4g29990

FERVLGKGGFGKVYHGFLNGDQVAVKILSEESTQGYKEFRAEVELLMRVHHTNLTSLIGYCNE  
DNHMALIIYEMANGNLGDYLSGKSSLILSWEERLQISLDAAQGLEYLHYGCKPPIVHRDVKPA  
NILLNENLQAKIADFGLSRSFPVEGSSQVSTVVAGTIGYLDPEYYATRQMNEKSDVYSFGVVLL  
EVITGKPAIWHSRTESVHLSQVGSMLANGDIKGIVDQRLGDRFEVGSAAWKITELALACASESS  
EQRPTMSQVVMELKQ

>At4g33430

SNKNILGRGGFGKVYKGRLADGTLVAVKRLKEERTQGGELQFQTEVEMISMAVHRNLLRLRGF  
CMTPTERLLVYPYMANGSVASCLRERPEQPPLDWPKRQRIALGSARGLAYLHDHCDPKIIHR  
DVKAANILLDEEFEAVVGDFGLAKLMDYKDTHVTTAVRGTIGHIAPEYLSTGKSSEKTDVFGY  
GVMLLELITGQRAFDLARLANDDDVMLLDWVKGLLKEKKLEALVDVDLQGNKYKDEEVEQLI  
QVALLCTQSSPMERPKMSEVVRMLEGD

>At2g13790

SNKNVLGRGGFGKVYKGRLADGNLVAVKRLKEERTKGGELQFQTEVEMISMAVHRNLLRLRG  
FCMTPTERLLVYPYMANGSVASCLRERPEGNPALDWPKRKHIALGSARGLAYLHDHCDQKIIH  
RDVKAANILLDEEFEAVVGDFGLAKLMNYNDSHVTTAVRGTIGHIAPEYLSTGKSSEKTDVFG  
YGVMLLELITGQKAFDLARLANDDDIMLLDWVKEVLKEKKLESVDAELEGKYVETEVEQLI  
QMAALLCTQSSAMERPKMSEVVRMLEGD

>At1g71830

SNKNILGRGGFGKVYKGRLADGTLVAVKRLKEERTPGGELQFQTEVEMISMAVHRNLLRLRGF  
CMTPTERLLVYPYMANGSVASCLRERPPSQPPLDWPTRKRIALGSARGLSYLHDHCDPKIIHRD  
VKAANILLDEEFEAVVGDFGLAKLMDYKDTHVTTAVRGTIGHIAPEYLSTGKSSEKTDVFGYGI  
MLLELITGQRAFDLARLANDDDVMLLDWVKGLLKEKKLEMLVDPDLQTNYEERELEQVIQV  
ALLCTQGSPMERPKMSEVVRMLEGD

>At1g34210

SNKNILGRGGFGKVYKGRLADGTLVAVKRLKEERTPGGELQFQTEVEMISMAVHRNLLRLRGF  
CMTPTERLLVYPYMANGSVASCLRERPPSQLPLAWSIRQQIALGSARGLSYLHDHCDPKIIHRD  
VKAANILLDEEFEAVVGDFGLARLMDYKDTHVTTAVRGTIGHIAPEYLSTGKSSEKTDVFGYGI  
MLLELITGQRAFDLARLANDDDVMLLDWVKGLLKEKKLEMLVDPDLQSNYTEAEVEQLIQV  
ALLCTQSSPMERPKMSEVVRMLEGD

>At5g16000

MESTIVMMMMITRSFFCFLGFLCLLCSSVHGLLSPKGVNFEVQALMDIKASLHDPHGVLDNW  
DRDAVDPCSWTMVTCSSENFVIGLGTSPQNLSGTLSPSITNLNLNLRIVLLQNNNIKGIKIPAEIGRL  
TRLETLDLSDNFFHGEIPFSVGYLQSLQYLRLNNNSLSGVFPLSLSNMTQLAFLDLSYNNLSGP  
VPRFAAKTFSIVGNPLICPTGTEPDCNGTTLIPMSMNLNQTVPLYAGGSRNHKMAIAVGSSVG  
TVSLIFIAVGLFLWWRQRHNQNTFFDVKDGNHHEEVSLGNLRRFGFRELQIATNNFSSKNL

>At3g25560

VGKGGFGNVYKGCCLHDGSIIAVKRLKDINNGGGEVQFQTELEMISLAVHRNLLRLYGFCTTSSE  
RLLVYPYMSNGSVASRLKAKPVLDWGTRKRIALGAGRGLLYLHEQCDPKIIHRDVKAANILLD  
DYFEAVVGDFGLAKLLDHEESHVTTAVRGTVGHIAPEYLSTGQSSEKTDVFGFGILLLELITGLR  
ALEFGKAANQRGAILDWVKKLQKEKKLEQIVDKDLKSNYDRIEVEEMVQVALLCTQYLPPIHR  
PKMSEVVRMLEGD

>At1g60800

KNILGRGGYGIVYKGHLNDGTLVAVKRLKDCNIAGGEVQFQTEVETISLALHRNLLRLRGFCSS  
NQERILVYPYMPNGSVASRLKDNIRGEPALDWSRRKKIAVGTARGLVYLHEQCDPKIIHRDVKA  
ANILLDEDFEAVVGDFGLAKLLDHRDSHVTTAVRGTVGHIAPEYLSTGQSSEKTDVFGFGILL  
ELITGQKALDFGRSAHQKGVMLDWVKKLHQEGKLKQLIDKDLNDKFDRELEEIVQVALLCT  
QFNPSHRPKMSEVMKMLEGD

>At3g13065

MNSPSKLKGWSSSGGDPCGDSWDGITCKGSSVTEIKVSGRGLSGSLGYQLGNLKSITYLDVSK  
NNLNGNLPYQLPDKLTYLDGSENFNGNVPYSVSLMNDLSYLNLRNNLNGELSDMFQKLPK

LETIDLSSNQLTGKLPQSFANLTGLKTLHLQENQFKGSINALRDLPQIDDVNVANNQFTGWIPNE  
LKNIGNLETGGNKWSSGRAPSPPPGTRHIDRNSSGGGGSSKALTGLGVIIAVSSIGGLILFAGLIA  
LISRRKNSNDSSHFFDDEKGTNRSKPLFTPQSSQMLQFDNMEEFKNQKTVDSNTSLETKPSVKR  
TSSVSFKNSPTFHLIPSTQVAATPDRSSTSQDSPDTRGVKAFSLADLQNTASCFSP

>At1g11130

IIGEGSIGNVYRAELRHGKFLAVKKLSNTINRTQSDGEFLNLVSNVLKLRGHILELLGYCNEFG  
QRLLVYEYCPNGSLQDALHLDRKLHKKLTWNVRINIALGASKALQFLHEVCQPPVVHQNFKS  
SKVLLDGKLSVRVADSGLAYMLPPRPTSQMAGYAAPEVEYGSYTCQSDVFSLGVMLELLTG  
RRPFDRTPRGHQTLAQWAIPRLHDIDALTRMVDPSLHGAYPMKSLSRFADIISRLQMEPGFRP  
PISEIVQDLQ

>At4g39400

IGSGGFGDVYKAILKDGSVAIAKKLIHVSQGQDREFMAEMETIGKIKHRNLVPLLGYCKVGDE  
RLLVYEFMKYGSLEDVLHDPKKAGVKLNWSTRRKIAIGSARGLAFLHHNCSPHIIHRDMKSSN  
VLLDENLEARVSDFGMARLMSAMDTHLSVSTLAGTPGYVPPEYYQSFRCSTKGDVYSYGVVL  
LELLTGKRPTDSPDFGDNNLVGWVKQHAKLRISDVFDPELMKEDPALEIELLQHLKVAVACLD  
DRAWRRPTMVQVMAMFKEI

>At1g55610

VGSGGFGEVYKAQLRDGSVVAIKKLIRITGQGQDREFMAEMETIGKIKHRNLVPLLGYCKVGEE  
RLLVYEYMKWGSLETVLHEKSSKGGIYNWAARKKIAIGAARGLAFLHHSCIPHIIHRDMKS  
SNVLLDEDFEARVSDFGMARLVSALDTHLSVSTLAGTPGYVPPEYYQSFRCSTAKGDVYSYGVV  
LLELLSGKKPIDPGEFGEDNNLVGWAKQLYREKRGAEILDPELVTDKSGDVELFHYLKIASQCL  
DDRPFKRPTMIQLMAMFKE

>At2g01950

IGHGGFGFVKATLKDGSVAIAKKLIRLSCQGQDREFMAEMETIGKIKHRNLVPLLGYCKIGEER  
LLVYEFMQYGSLEEVLHGPRTGEKRRILGWEERKKIAKGAAGLCFLHHNCIPHIIHRDMKSS  
NVLLDQDMEARVSDFGMARLISALDTHLSVSTLAGTPGYVPPEYYQSFRCSTAKGDVYSYGVV  
MLEILSGKRPTDKEEFGDTNLVGWSKMKAREGKHMEVIDEDLLKEGSSESLENEKEGFEGGVIV  
KEMRLYLEIALRCVDDFPSKRPNMLQVVASLREL

>At3g13380

IGSGGFGDVYKAKLADGSVVAIKKLIQVTGQGQDREFMAEMETIGKIKHRNLVPLLGYCKIGEE  
RLLVYEFMKYGSLETVLHEKTKKGGIFLDWSARKKIAIGAARGLAFLHHSCIPHIIHRDMKSSN  
VLLDQDFVARVSDFGMARLVSALDTHLSVSTLAGTPGYVPPEYYQSFRCSTAKGDVYSYGVILL  
ELLSGKKPIDPEEFGEDNNLVGWAKQLYREKRGAEILDPELVTDKSGDVELLHYLKIASQCLDD  
RPFKRPTMIQVMTMFKE

>At1G69270

IGHGGFGSTYKAEVSPTNVFAVKRLSVGRFQGDQQFHAEISALEMVRHPNLVMLIGYHASETE  
MFLIYNLYSGGNLQDFIKERSKAAIEWKVLHKIALDVARALSYLHEQCSPKVLHRDIKPSNILL  
DNNYNAYLSDFGLSKLLGTSQSHVTTGVAGTFGYVAPEYAMTCRVSEKADVYSYGIVLLELIS  
DKRALDPSFSSHENGFNIVSWAHMMLSQGKAKEVFTTGLWETGPPDDLVEVLHLALKCTVDS  
LSIRPTMKQAVRLLKRI

>At3g02130

IGNGGFGATYKAEISQDVVVAIKRLSIGRFQGVQQFHAEIKTLGRLRHPNLVTLIGYHASETEMF  
LVYNYLPGGNLEKFIQERSTRDWRVLHKIALDIARALAYLHDQCVPRVLHRDVKPSNILLDDD  
CNAYLSDFGLARLLGTSETHATTGVAGTFGYVAPEYAMTCRVSDKADVYSYGVVLELLSDK

KALDPSFVSYGNFNIVQWACMLLRQGRAKEFFTAGLWDAGPHDDLVEVLHLAVVCTVDSLS  
TRPTMKQVVRRLKQL

>At5g07280

IGDGGFGTVYKACLPGKTVAVKKLSEAKTQGNREFMAEMETLGKVKHPNLVSLLGYCSFSE  
EKLLVYEYMVNGSLDHWLRNQTMLEVLDWSKRLKIAVGAARGLAFLHHGFIPHHHRDIKAS  
NILLDGDGFEPKVADDFGLARLISACESHVSTVIAGTFGYIPPEYQGSARATTKGDVYSFGVILLEL  
VTGKEPTGPDFKESEGGNLVGWAIQKINQGKAVDVIDPLLVSVALKNSQLRLLQIAMLCCLAETP  
AKRPNMLDVLKALKEI

>At5g48380

IATGRTGTMYKGRLEDGSLMIKRLQDSQRSEKEFDAEMKTLGSVKNRNLVPLLGYCVANKE  
RLLMYEYMANGYLYDQLHPADEESFKPLDWPSRLKIAIGTAKGLAWLHHSCNPRIIHRNISSKC  
ILLTAEFEPKISDFGLARLMNPIDTHLSTFVNGEFGDFGYVAPEYSRTMVATPKGDVYSFGVVLL  
ELVTGQKATSVTKVSEEKAEENFKGNLVEWITKLSSESKLQEAIDRSLLGNGVDDEIFKVLKV  
ACNCVLPEIAKQRPTMFEVYQLL

>At4g20140

IGSGGSGKVYKAELENGETVAVKKILWKDDLMSNKSFSREVKTLGRIHRHRLVKLMGYCSSKS  
EGLNLLIYEYMKNGSIWDWLHEDKPVLEKKKKLLDWEARLRIAVGLAQGVEYLHHDCVPPIV  
HRDIKSSNVLLDSNMEAHLGDFGLAKVLTENCNTNTDSNTWFACSYGYIAPEYAYSLKATEKS  
DVYSMGIVLMEIVTGKMPTDSVFGAEMDMVRWVETHLEVAGSARDKLIDPKLKPLLPFEEA  
ACQVLEIALQCTKTSPQERPSSRQ

>At5g44700

IGSGGSGKVYKAELKNGETIAVKKILWKDDLMSNKSFNREVKTLTGTIRHRHRLVKLMGYCSSKA  
DGLNLLIYEYMANGSVWDWLHANENTKKKEVLGWETRLKIALGLAQGVEYLHYDCVPPIVH  
RDIKSSNVLLDSNIEAHLGDFGLAKILTGNIDTNTESNTMFAGSYGYIAPEYAYSLKATEKSDV  
YSMGIVLMEIVTGKMPTEAMFDEETDMVRWVETVLDTPPGSEAREKLIDSELKSLLPCEEEAA  
YQVLEIALQCTKSYPQERPSSRQASEYL

>At1g75820

IGKGGAGIVYRGSMNNVDVAIKRLVGRGTGRSDHGFNAEIQTLGRIRHRHIVRLLGYVANKDT  
NLLLYEYMPNGSLGELLHGSKGGHLQWETRHRVAVEAAKGLCYLHHDCSPLILHRDVKSNNIL  
LDSDFEAHVADDFGLAKFLVDGAASECMSSIAAGSYGYIAPEYAYTLKVDEKSDVYSFGVVLELI  
AGKKPVGEFGEGVDIVRWVRNTEEEITQPSDAAIVVAIVDPRLTGYPLTSVIHVFKIAMMCVEE  
EAAARPTMREVVHMLTNP

>At5g65700

IGKGGAGIVYKGVMPNGDLVAVKRLAAMSRGSSHDHGFNAEIQTLGRIRHRHIVRLLGFCSNH  
ETNLLVYEYMPNGSLGEVLHGKKGGHLHWTRYKIALEAAKGLCYLHHDCSPLIVHRDVKS  
NILLDSNFEAHVADDFGLAKFLQDSGTSECMSAIAAGSYGYIAPEYAYTLKVDEKSDVYSFGVVLL  
ELVTGRKPVGEGFDGVDIVQWVRKMTDSNKDSVLKVLDPRLSSIPIHEVTHVFYVAMLCVEEQ  
AVERPTMREVVQILTEI

>At3g49670

IGKGGAGIVYKGTMPKGDVAVKRLATMSHGSSHDHGFNAEIQTLGRIRHRHIVRLLGFCSNH  
ETNLLVYEYMPNGSLGEVLHGKKGGHLHWTRYKIALEAAKGLCYLHHDCSPLIVHRDVKS  
NILLDSNFEAHVADDFGLAKFLQDSGTSECMSAIAAGSYGYIAPEYAYTLKVDEKSDVYSFGVVLL  
ELITGKKPVGEFGDGDIVQWVRSMTDSNKDCVLKVIDLRLSSVPVHEVTHVFYVALLCVEEQ  
AVERPTMREVVQILTEI



>At4g20270

IGKGGRGIVYKGVMPNGEEVAVKKLLTITKGSSHDNGLAAEIQTLGRIRHRNIVRLLAFCSNKD  
VNLLVYEYMPNGSLGEVLHGKAGVFLKWETRLQIALEAAKGLCYLHHDCSPLIHRDVKSNNI  
LLGPEFEAHVADFLAKFMMQDNGLASECMSSIAGSYGIAPEYAYTLRIDEKSDVYSFGVLL  
ELITGRKPVDFGEEGIDIVQWSKIQTNCNRQGVVKIIDQRLSNIPLAEAMELFFVAMLCVQEH  
SVERPTMREVVQMIS

>At2g31880

LEIIGRGCGEVFKAELPGSNGKIIAVKKVIQPPKDADELTDDESKFLNKKMRQIRSEINTVGHI  
RHRNLLPLLAHVS RPECHYLVYEYMEKGS LQDILT DVQAGNQELMWP ARHKIALGIAAGLEY  
LHMDHNPRIIHRDLKPANVLLDDDMEARISDFGLAKAMPDAVTHITTS HVAGTVGYIAPEFYQ  
THKFTDKCDIYSFGVILGILVIGKLPSDEFFQHTDEMSLIKWMRNIITSENPSLAIDPKLMDQGFD  
EQMLLV LKIACTLD DPKQRPNSKDVRTMLSQI

>At4g28490

IGFGSSGKVYKVELRGGEVVAVKKLNKSVKGGDDEYSSDSLNRDVFAAEVETLGTIRHKSIVR  
LWCCSSGDCKLLVYEYMPNGSLADVLHGDRKGGVVLGWPERLRIALDAAEGLSYLHHDCV  
PIVHRDVKSSNILLSDY GAKVADFGIAKVGQMSGSKTPEAMSGIAGSCGYIAPEYVYTLRVN  
EKSDIYSFGVVLLELVTGKQPTDSELGDKDMAKWVCTALDKCGLEPVIDPKLDLKFKEEISKVI  
HIGLLCTSP LPLNRPSMRKVVIMLQEVSGAVPCSSPNTSKRSKTGGKLS PYYTEDLN

>At3g19700

IGRGGQGNVYKVS LRSGETLAVKHIWCPESSHESFRSSTAMLSDGNNRSNNGEFEAEVATLSNI  
KHINVVKLFCSITCEDSKLLVYEYMPNGSLWEQLHERRGEQEIGWRVRQALALGAAKGLEYL  
HHGLDRPV IHRDVKSSNILLDEEWRPRIADFLAKIIQADSVQRDFSAPLVKGT LGYIAPEYAYT  
TKVNEKSDVYSFGVVLME LVTGKKPLETDFGENNDIVMWVWSVSKETNREMMMKLIDTSIE  
DEYKEDALKVLTIALLLCTDKSPQARPFMKS VVSMLEKI

>At5g61480

LGMGSTGT VYKAEMPNGEIIAVKKLWGKNKENGKIRRRKSGVLAEVDVLGNVRHRNIVRLLG  
CCTNRDCTMLLYEYMPNGSLDDLHGDKTMTAAAEWTALYQIAIGVAQGICYLHHDCDPVI  
VHRDLKPSNILLDADF EARVADFGVAKLIQTDESM SVVAGSYGYIAPEYAYTLQVDKKS DIYSY  
GVILLEIITGKRSVEPEFGEGNSIVDWVR SKLKT KEDVEEVLDKSMGRSCSLIREEMKQMLRIA  
LLCTSRSP TDRPPMRDVLLILQE

>At5g46330

IGSSSLSTVYKQLEDGT VIAVKVLNLKEFSAESDKWFYTEAKTLSQLKHRNLVKILGFAWESG  
KTKALVLPFMENGNLEDTIHGSAAPIGSLLEKIDLCVHIASGIDYLHSGYGFPIVHCDLK PANILL  
DSDRVAHVSDFGTARILGFREDGSTTASTSAFEGTIGYLAPEFAYMRKVTTKADVFSFGIIMMEL  
MTKQRPTSLNDEDSQDMTLRQLVEKSIGNGRKGMVRVLDMELGDSIVSLKQEEAIEDFLKLCL  
FCTSSRPEDRPDMNEILTHLMKL

>At5g20480

IGSGNFGNVFKGLLGPENKLVAVKVLNLLKHGATKSFMAECETFKGIRHRNLVKLITVCSSLDS  
EGNDFRALVYEFMPKGSLDMWLQLEDLERNVDHRSRLTPAEKLNIAIDVASALEYLHVHCHDP  
VAHCDIKPSNILLDDDLTAHVSDFGLAQLLYKYDRESFLNQFSSAGVRGTIGYAAPEYGMGGQP  
SIQGDVYSFGILLLEMFSGKKPTDESFA GDYNLHSYTKSILSGCTSSGGSNAID EGLRLVLQVGI  
KCSEYPRDRMRTDEAVRELISI

>At1g31420

IGCGGFGTVYK LAMDDGKVFALKRILKLNEGFD RFFERELEILGSIKHRYLVNLRGYCNSPTSK  
LLLYDYLPGGSLDEALHVERGEQLDWDSRVNIIIGAAGLSYLHHDCSPRIIHRDIKSSNILLDG  
NLEARVSDFG LAKLLEDEESHITTIVAGTFGYLAPEYMQSGRATEKTDVYSFGVLVLEVL SGKR  
PTDASFIEKGLNVVGWLKFLISEKRPRDIVDPNCEGMQMESLDALLSIATQCVSPSPEERPTMH  
RVVQLLE

>At2g35620

IGCGGFGTVYKLSMDDGNVFALKRIVKLNEGFD RFFERELEILGSIKHRYLVNLRGYCNSPTSK  
LLLYDYLPGGSLDEALHKRGEQLDWDSRVNIIIGAAGLAYLHHDCSPRIIHRDIKSSNILLDGN  
LEARVSDFG LAKLLEDEESHITTIVAGTFGYLAPEYMQSGRATEKTDVYSFGVLVLEVL SGKLP  
TDASFIEKGFNIVGWLNFLISENRAKEIVDLSCGVERESLDALLSIATKCVSSSPDERPTMHRV  
VQLLE

>At2g26330

IGHGASSTVYKCVLKNCKPVAIKRLYSHNPQSMKQFETELEMLSSIKHRNLVSLQAYSLSHLGS  
LLFYDYLENGSLWDL LHGPTKKKTLDWDT RLKIAYGAAQGLAYLHHDCSPRIIHRDVKSSNIL  
LDKDLEARLTDFGIAKSLCVSKSHTSTYVMGTIGYIDPEYARTSRLTEKSDVYSYGIVLLELLTR  
RKAVDDESNLHHLIMSKTGNNEVMEMADPDITSTCKDLGVVKKVFQLALLCTKRQPNDRPT  
MHQVTRVL

>At5g62230

IGYGASSTVYKCAL KSSRPIAIKRLYNQYPHNLREFETELETIGSIRHRNIVSLHGYALSPTGNLL  
FYDYMENGSLWDL LHGSLKKVKLDWETRLKIAVGAAQGLAYLHHDCSPRIIHRDIKSSNILLD  
ENFEAHLSDFGIAKSIPASKTHASTYVLGTIGYIDPEYARTSRINEKSDIYSFGIVLLELLTGKKAV  
DNEANLHQLILSKADDNTVMEAVDPEVTVT CMDLGHIRKTFQLALLCTKRNP LERPTMLEVSR  
VL

>At5g07180

IGYGASSTVYKCTSKTSRPIAIKRIYNQYPSNFR EFETELETIGSIRHRNIVSLHGYALSPFG

**supplementary Data Set 2 Amino acid sequences for motif analysis**

>VMLRR-RLK210

MTQRSIAAGLPQDEVDALNQIITKMGASFGNFSADKACGDLVEQVQSTD  
PERSITCNCTFPNNT  
CHITSLEIKRYSLPGQLPPELVQLPYLETIDFAYNYLNGSIPREWAS  
MPLKSISLLANRLSGNIPSY  
LENFTNLTYLNIELNQFSGTVPRELGKLVNLEKLILSSNKLSGNLPMELGDLNLTDFRINDNSLN  
GSIPDFIQNWKQLGRLEIQASGLEGPISSISFLEKLTNLRISDINATNQLFPDLSNITDLKWLILKN  
CNISGEIPPYIWQMSKVEILDLSFNNLNGELPDSILVGIWRVITLSGNSLSGKLP  
IWRQGINVDLS  
YNNFTRESTEQPTCQQRDVMLNLFSSSMGNDIGGACANDFRCDQYWYS  
MYINCGGENVNT  
DDRTYEGDSVASGNDDWGLSSAGDFMDDNDFLNTDYTEVNSPSLNIGEL  
YRTARLSPLSLTYH  
RCLMNESYTVSLHFAEQFTNDSTYNSLGRRIFDIYIQNDRVEKDFNIEVEANGVAMPIVKKYN  
ATVTNNILEIRFFWAGKGTTRIPKSGVYGPLISAISVDPNFEPSPRGGKTKIAPIVGVGVG  
SCLILL  
ALVVIGWRRYFRENNGRQKDLEGLESQTVSFTLKHKAATKNFDPSN  
KIGEGGFGPVYKGLLP  
DGTAVIAVKQLSSKSSQGNREFLNEIGMISCLQHPNLVKLHGCCVEGNQ  
LLLVEYEMENSLAR  
ALLGPEHSRIKLDWQTRQRICVGIARGLAFLHEESRLKIVHRDIKATNVLLDKHLNPKISDFGLA  
KLDTEEKTHISTRIAGTMGYMAPEYALWGYLTHKVDVYSFGIVALEIVSGKH  
NMSHGPENNFA  
CLLDWACHLQQSGNLMELVDEKLGSDFKKKEAERMIKASLLCTNGSPSLRPSMSEV  
VNMLEG  
TAIIPDVIPEANNYNEDLRFKAIREHQKQIRSESSRGSQDHNSISIKSENEASSAS  
AIDLHEINEVS  
SMRYKARKDLKQMDSQVSTSFSTASSASVHDPYDFNSNSQ

>VMLRR-RLK208

MTQRSIAAGLPQDEVDALNQIITKMGASFGNFSADKACGDLVEQVQSTD  
PERSITCNCTFPNNT  
CHITSLEIKRYSLPGQLPPELVQLPYLETIDLAYNYLNGSIPREWAS  
MPLKSISLLANRLSGNIPSY  
LENFTNLTYLNIELNQFSGTVPRELGKLVNLEKLILSSNKLSGNLPMELGDLNLTDFRINDNSLN  
GSIPDFIQNWKQLGRLEIQASGLEGPISSISFLEKLTNLRISDINATNQLFPDLSNITDLKWLILKN  
CNISGEIPPYIWQMSKVEILDLSFNNLNGELPDSILVGIWRVITLSGNSLSGKLP  
IWRQGINVDLS  
YNNFTRESTEQPTCQQRDVMLNLFSSSMGNDIGGACANDFRCDQYWYS  
MYINCGGENVNT  
DDRTYEGDVVASGTVSELYSSNDDWGLSSTGDFMDDDNFLKTDYTAIS  
SSLNIDELYRTARLS  
P  
LSLTYH  
RCLMNESYTVSLHFAEQFTNDSTYNSLGRRIFDIYIQNDRVEKDFNIEVEANGV  
VTP  
IVKKYNATVTNNILEIRFFWASKGTTRIPGRGVYGPLISAISVDPNFEPSPRGGKTKIAPIVGVV  
G  
SCLILLALVVIGWRRYFRENNGRQKDLEGLESQTVSFTLKHKAATKNFDPSN  
KIGEGGFGPV  
YKGLLPDGTAVIAVKQLSSKSSQGNREFLNEIGMISCLQHPNLVKLHGCCVEGNQ  
LLLVEYEME  
NNSLARALLGPEHSRIKLDWQTRQRICVGIARGLAFLHEESRLKIVHRDIKATNVLLDKHLNPK  
ISDFGLAKLDTEEKTHISTRIAGTMGYMAPEYALWGYLTHKVDVYSFGIVALEIVSGKH  
NMSH  
GPENNFA  
CLLDWACHLQQSGNLMELVDEKLGSDFKKKEAERMIKASLLCTNGSPSLRPSMSEV  
VNMLEG  
TAIIPDVIPEANNYNEDLRFKAIREHQKQIRSESSRGSQDHNSISIKSENEASSAS  
AIDL  
HEINEVSSMRYKARKDLKQMDSQVSTSFSTASSASVHDPYDFNSNSQ

>VFLRR-RLK271

MTQRSIAAGLPQDEVDALNQIITKMGASFGNFSADKACGDLVEQVQSTD  
PERSITCNCTFPNNT  
CHITSLEIKRYSLPGQLPPELVQLPYLETIDFAYNYLNGSIPREWAS  
MPLKSISLLANRLSGNIPSY  
LENFTNLTYLNIELNQFSGTVPRELGKLVNLKTLILSSNKLSGNLPMELGDLNLTDFRINDNSLN  
GSIPDFIQNWKQLGRLEIQASGLEGPISSISFLEKLTNLRISDINATNQLFPDLSNITSLKWLILRN  
CNMSGVIPSNIWQMSQLEILDLSFNKLHGELPNSILTGLWRVITLSGNSLSGKLP  
IWRQGINVDL  
SYNNFTRESAEQPTCQQRDVMLNLFSSSMGNDIGGACANDFRCDQYWYS  
MYINCGGENVN  
TDDRTYEGDSVASGNDDWGLSSAGDFMDDNDFLNTDYTEVNSPSLNIGEL  
YRTARLSPLSLTYH  
H  
RCLMNESYTVSLHFAEQFTNDSTYNSLGRRIFDIYIQNDRVEKDFNIEVEANGVAMPIVKKY

NATVTNNILEIRFFWAGKGTTRIPKSGVYGPLISAISVDPNFEPPSRGGKTKIAPIVVGVVGSCLIL  
LALVVIGWRRYFRENNGRQKDLEGLESQTVSFTLKHKAATKNFDPSNKIGEGGFPGVYKGLL  
PDGTVIAVKQLSSKSSQGNREFLNEIGMISCLQHPNLVKLHGCCVEGNQLLLVYEYMEENSLA  
RALLGPEHSRIKLDWQTRQRICVGIARGLAFLHEESRLKIVHRDIKATNVLLDKHLNPKISDFGL  
AKLDTEEKTHISTRIAGTMGYMAPEYALWGYLTHKVDVYSFGIVALEIVSGKHNM SHGPENNF  
ACLLDWACHLQQSGNLMELVDEKLGSDFFKKKEAERMIKASLLCTNGSPSLRPSMSEVVNMLE  
GTAIIPDVIPEANNYNEDLRFKAIREHQKQIRSESSRGSQDHNSISIKSENEASSASAILHEINEV  
SSMRYKARKDLKQMDSQVSTFSITASSASVHDPYDFNSNSQ

>VFLRR-RLK159

MQLKSISLLVNRLSGNVPSYLQNFTSLTYLNIEANQFSGPVPQELGKLVNLKSLILSSNNLSGNL  
PVELSELKNLTD FRISDNNFN GSIPDFIQGWQQLDRLEMEAGGLKGPIPSSTSVLKNLTDLRISEL  
NGTTQAFPNLSSITGLRRLVLRNCNISGEIPAYIWGMNDLRTLDSL FNKLSGRLPTSINTANLLFL  
FLSHNMLNGDIPIRKIDVDLSYNNFTKQSPARPACQQTREMNLNLFSSSMRNDLGGACME  
DFRCDRYWHNLYINCGGFTEIINGSTYEGDADDAGGAARFHQNSNNWGFSSTDGDFLGDNNDR  
NLDSNIISLSSSNLDGLYRTARISPLSLTYRYRYCLENGSYSVSLHFAEIQFTEDKLYNRIGRRLFDI  
YIQDNLVEKDFNTKTEASAVLTPITKSYNANVSNGTLEIRFYWSGKGTTRIPRIGVYGPIISAISV  
NSNFKPQSGGRKTKVVPVIGVVGSCILFVGLWWRRCSKAKSKRQKEGLEFQTASFTLK  
QIKAATNNFDHANKIGEGGFPGVYKGLLADGTIAIAVKQLSSKSSQGNX

>VMLRR-RLK178

MQLKSISLLVNRLSGNVPSYLQNFTSLTYLNIEANQFSGPVPQELGKLVNLKSLILSSNNLSGNL  
PVELSELKNLTD FRISDNNFN GSIPDFIRSWQQLDRLEMEASGLKGPIPSSTSVLKNLTDLRISEL  
NGTTQAFPNLSSITGLRRLVLRNCNISGEIPAYIWGMNDLRTLDSL FNKLSGKLPTSINTANLLFL  
FLSHNMLNGDIPIRKIDVDLSYNNFTKQSPARPACQQTREMNLNLFSSSMRNDLGGACME  
DFRCDRYWHNLYINCGGFTEIINGSTYEGDADDAGGAARFHQNSNNWGFSSTDGDFLGDNNDR  
NLDSNIISLSSSNLDGLYRTARISPLSLTYRYRYCLENGSYSVSLHFAEIQFTEDKLYNRIGRRLFDI  
YIQDNLVEKDFNTKTEASAVLTPITKSYNANVSNGTLEIRFYWSGKGTTRIPRIGVYGPIISAISV  
NSNFKPQSGGRKTKVVPVIGVVGSCILFVGLWWRRCSKAKSKRQKEGLEFQTASFTLK  
QIKAATNNFDHANKIGEGGFPGVFKGLLADGTVIAIAVKQLSSKSSQGNX

>VFLRR-RLK255

XQDLA GILPRAIVKLPYLNLYDLTRNYLSGNIPSEWISMKLEYLILSVNRLTGQIPSYLGNIFTLK  
GLSLENNMFSGTVPHQLGNLVNLEIFVLSANNLTGTL PVALTNLTKLTELRISSNKFIGKIPSFQ  
WKHLQRLEIQASGLEGPISSISALNNLIELRISDIQEGEGSEFPHLENMTGMNKLMLRNCNISGP  
VPQYITAMPNLKILDLSFNRMGGNLSADFKGLTTLENLYLTSNLLSGPIPDWLLNGDTRDAIDL  
RNNFTENSAPSTCRTTLNLFKSTSGGNNSKVAEYSLHINCGGGTTKIGSVTYEADDESGDAAKY  
VPSKESWEISNTGHFWDKVRSSSDYIAQNSSILRMKNSELYTTARLSPLSLSYARCLANGNYS  
VKLHFAEIVMRDNRSFYSLGRRIFDVYIQENRVLKDFNIVEEAQGVDKVIIRDFAIVKDGTL  
EIRFWAGKGTATPKRGIYGPLISAIDVESDFKPTVSIEAKKKKFIVAGAVVLPFLILITGTLWW  
KGYLGGRAVKEQELLGLDLHTGIFTFRQIKAATNNFN PANKLGAGGFGAVYKGTLDGTIIAV  
KQLSSRSKQGNREFLNEIGMISVLQHPNLVRLYGCCVEGNQLLLVYEYMEENSLAHVLFDAEE  
SQSKLDWATRQRICVGIAGLAFLHEESALKIVHRDIKTANILLDGDLPKISDFGLAKLDEEEN  
THISTR

>VMLRR-RLK172

MRADLANPNPKLLLLLTICFITFFSFAASTSKLHPTEVKALKDIGKKLGKKDWNFGKDPCSGEG  
NWSILDEIKGFESSVICNCRFNHNSTCHVVSIALKAQNLSGIVPPEFSKLRYLELLDL SRNCLTGS

IPSQWATMRLVDLSFMGNRLSGSFPKVLTNISTLKNLSIEGNSFSGSIPPEIGKLIHLHKFILSSNA  
FTGKLPAEFSKLANLMDMRINDNNFSGKIPGFISKWTQIQKLHIQCGLEGPIPPSISVLTSLTDL  
RITDLKGKGSTFPPLSDMKSMKTLILRNCLLSGDIPEYIGHMKKLKNLDLSFNNLIGEIPASFSQL  
AKADFMYLTSNKLTGTPVWVLERNKNVDISDNNFTWESSPIECPRGSVNLVESYASSTEKLS  
RVHSCLKQNFPCSSSNKKYYSLHINCGGKEIIASGNTTYQADLEPRGASMFYSSQSWAFSSTGN  
FLDNDIEADSYIQMNTSAISNVSALDAQLYTTARTSPLSLTYYGLCLINGNYTVKLHFAEIVFIN  
DSSLNSLGKRIFDVYIQEKLVLKDFNIVEDAGGTGRPIVKTFTVAVTSHTLKIHFYWAGKGTTGI  
PLRGVYGPLISAISVDPNFKTPSDHNDEKNVIVSSTVGGTVFIVLLILCIMWRKGCLGGKVSAD  
KELRGLDLQTGIFTLRQIKAATKNFDAANKVGEFFGSVYKGLLSDGTAVKQLSSKSKQGN  
REFVNEIGMISALQHPNLVKLLGCCTEDNQLLLVYEYEMENNSLAHALFGSEELRLKLNWPIRF  
KICLGIAKGLAFLHEESKLKVHRDIKPTNVLLDKDLNAKISDFGLAKLYEAEKTHVITRIAGTT  
GYMAPEYAMRGYLTNKADVYSFGVVALEIVSGKNGTSYRPNDES VYLLDLAYVLQEKGDLLS  
LVDPMLGYDYSVKQAMTILDLAMLCTNPSPTLRPTMSEVVNVLEGKSKIKAPSFHVPYSTDDF  
AMAKAVASLIPRIRSGSSSGKTSNPVTYCWSRDEGEYGIYEDCSSEMLEMENTDSLVLKSS

>VMLRR-RLK215

MTKLKNLDLSFNKLTGDIPRSFSGAVKTDYIYLTGNMLTGVPDWILQKGENVDLSYNNFTTH  
SSCQERTVNLFSSSMNNVSTTVSCLRSNHCPKNFYSFHINCGGKEAVINEKTYEDDTSGGPS  
RFYQSRTNWAFSSTGNFMDDDRPTDSFTWTNTAKPGTSALYTDARLSPISLTYYGFCMGNGNY  
TVSLHFAEIMFTDDNTYNSLGRRIFDIYIQGKRVQKDFNLGVEAGGAGKAVKNFAAIVTNQTLE  
IRFYWNGKGTTAIPSRGVYGPLISAISVNPDFVPPSENGSSISAGTVVGIVVAVVAIIFVVLGVLW  
WKGCLRRKDTMNQDLKGLDLQTGSFTLKQIKAATNNFDRANKIGEGGFPGVYKGLLSDGTIIA  
VKQLSSKSKQGNREFVNEIGMISALQHPHLVKLYGCCIEGNQLLLVYEYEMENNSLARALFGKS  
NKHNLFLHFHDACTSEKYIIIAVFLCSLLIGDLKGYYEHLNLDWSTRHKICVGIARGLAFLHEE  
SRLKIVHRDIKATNVLLDKYLSKISDFGLAKLDEEENTHISTRVAGTFGYMAPEYAMRGYLT  
KADVYSFGIVALEIVSGRCNTSNRSNMKEECFYLLDWACVLKEKGNLLELVDPKLGKNYNKE  
QVMTMINVALLCTNVSPVVRPAMSSVVSMLLEGKASVQNLALDTSVSNDEMRIKAMRKHFQD  
SIEHSTSESLTQSMALDGPWTGSSTSAKDLYPISLGSDYWESRN

>VMLRR-RLK209

XFSFEAAQLPNDEVEALRDIKILGKRDNFNSVDPCSGELGWADLNPVEGQENAVKCNCFSN  
DTICHVVSIIKAQNLQGTLPADLGRFPFLQEI DLTRNYLNGTIPPEWGSTQLVNISLMGNRLTGP  
IPKELGNISTLANITVEFNKLSGELPQELGNLSRIERMLLTSNNFTGQLPPTFAKLTTLQDFRIGD  
NQFIGQIPDFIQNWTNLEKLVIQSGSLSGPIPSGIRLLGSITDLRISDLSNGTEVPFPTLSNMKNLK  
TLILRSCNIVGQLPDLGEMTKLKNLDLSFNKLTGDIPRTFSGAVKTDYIYLTGNMLTGVPDWI  
LQKGENVDLSYNNFTTHSSCQERTVNLFSSSMNNVSTTVSCLRSNHCPKNFYSFHINCGGKE  
AVINGKTYEDDTSGGPSRFYQSRTNWAFSSTGNFMDDDRPTDSFTWTNTAKPGTSALYTDAR  
LSPISLTYYGFCMGNGNYTVSLHFAEIMFTDDNTYNSLGRRIFDIYIQGKRVQKDFNLGVEAGG  
AGKAVKNFAAIVTNQTLEIRFYWNGKGTTAIPSRGVYGPLISAISVNPDFVPPSENGSSISAGTV  
VGIVVAVVAIIFVVLGVLWWKGCLRRKDTMNQDLKGLDLQTGSFTLKQIKAATNNFDPANKIG  
EGGFPGPVFKGLLSDGTIIAVKQLSSKSKQGNREFVNEIGMISALQHPHLVKLYGCCIEGNQLLLV  
YEYEMENNSLARALFGPEEHQLNLDWSTRHKICVGIARGLAFLHEESRLKIVHRDIKATNVLLD  
KYLSKISDFGLAKLDEEENTHISTRVAGTFGYMAPEYAMRGYLTDKADVYSFGIVALEIVSGR  
CNTSNRSNMKEECFYLLDWACVLKEKGNLLELVDPKLGKNYNKEQVMTMINVALLCTNVSP  
VVRPAMSSVVSMLLEGKASVQNLALDTSVSNDEMRIKAMRKHFQDSIEHSTSESLTQSMALDG  
PWTGSSTSAKDLYPISLGSDYWESRN

>VFLRR-RLK258

XFSFEAAQLPNDEVEALRDIAKILGKRDNFVSVDPCSGESGWADLNPVEGQENAVKCNCFSN  
DTICHVVSIIKAQNLQGTLPADLGRFPFLQEIDFTRNYLNGTIPPEWGTTQLVNISLMGNRLTG  
PIPKELGNISTLANITVEFNKLSGELPQELGNLSRIERMLLTSNNFTGQLPPTFAKLTTLQDFRIGD  
NQFTGQIPDFIQNWTNLEKLVIIQGSGLSGPIPSGIRLLGSITDLRISDLSNGTEIPFPTLSNMKNLK  
TLILRSCNIVGQLPDFLGEMTKLKNLDLSFNKLTGDIPRSFSGAVKTDYIYLTGNMLTGVPDWI  
LQKGENVDLSYNNFTTHSSCQERTVNLFGSSSMNNVSTTVSCLRSNHCPKNFYFSFHINCGGKE  
AVINEKTYEDDTSGGPSRFYQSRTNWAFSSTGNFMDDDRPTDSFTWTNTAKPGTSALYTDAR  
LSPISLTYYGFCMGNGNYTVSLHFAEIMFTDDNTYNSLGRRIFDIYIQGKRVQKDFNLGVEAGG  
AGKAVKNFAAIVTNHTLEIRFYWNGKGTTAIPSRGVYGPLISAISVNPDFVPPSENGSSISAGTV  
VGIVVAVVAIIFVVLGVLWWKGCLRRKDTMNQDLKGLDLQTGSFTLKQIKAATNNFDPANKIG  
EGGFGPVFKGLLSDGTIIAVKQLSSKSKQGNREFVNEIGMISALQHPHLVKLYGCCIEGNQLLLV  
YEYMENNSLARALFGPEEHQLNLDWSTRHKICVGIARGLAFLHEESRLKIVHRDIKATNVLLD  
KYLNSKISDFGLAKLDEEENTHISTRVAGTFGYMAPEYAMRGYLTDKADVYSFGIVALEIVSGR  
CNTSNRSNMKEECFYLLDWACVLKEKGNLLELVDPKLGKNYNKEQVMTMINVALLCTNVSP  
VVRPAMSSVVSMLLEGKASVQNLALDTSVSNDEMRIKAMRKHQDSIEHSTSESLTQSMALDG  
PWTGSSTSADLYPISLGSDYWESRN

>VFLRR-RLK261

XFSFEAAQLPNDEVEALRDIAKILGKRDNFVSVDPCSGELGWADLNPVEGQENAVKCNCFSN  
DTICHVVSIIKAQNLQGTLPADLGRFPFLQEIDFTRNYLNGTIPPEWGSTQLVNISLMGNRLTGP  
IPKELGNISTLANITVEFNKLSGELPQELGNLSRIERMLLTSNNFTGQLPPTFAKLTTLQDFRIGD  
NQFTGQIPDFIQNWTNLEKLVIIQGSGLSGPIPSGIRLLGSITDLRISDLSNGTEIPFPTLSNMKNLK  
TLILRSCNIVGQLPDFLGEMTKLKNLDLSFNKLTGDIPRSFSGAVKTDYIYLTGNMLTGVPDWI  
LQKGENVDLSYNNFTTHSSCQERTVNLFGSSSMNNVSTTVSCLRSNHCPKNFYFSFHINCGGKE  
AVINEKTYEDDTSGGPSRFYQSRTNWAFSSTGNFMDDDRPTDSFTWTNTAKPGTSALYTDAR  
LSPISLTYYGFCMGNGNYTVSLHFAEIMFTDDNTYNSLGRRIFDIYIQGKRVQKDFNLGVEAGG  
AGKAVKNFAAIVTNHTLEIRFYWNGKGTTAIPSRGVYGPLISAISVNPDFVPPSENGSSISAGTV  
VGIVA AVVAIIFVVLGVLWWKGCLRRKDTMNQDLKGLDLQTGSFTLKQIKAATNNFDPANKIG  
EGGFGPVFKGLLSDGTIIAVKQLSSKSKQGNREFVNEIGMISALQHPHLVKLYGCCIEGNQLLLV  
YEYMENNSLARALFGPEEHQLNLDWSTRHKICVGIARGLAFLHEESRLKIVHRDIKATNVLLD  
KYLNSKISDFGLAKLDEEENTHISTRVAGTFGYMAPEYAMRGYLTDKADVYSFGIVALEIVSGR  
CNTSNRSNMKEECFYLLDWACVLKEKGNLLELVDPKLGKNYNKEQVMTMINVALLCTNVSP  
VVRPAMSSVVSMLLEGKASVQDLALDTSVSNDEKRIKAMRKHQDSIEHSTSESLTQSMALDGP  
WTGSSTSADLYPISLGSDYWEX

>VFLRR-RLK275

MFFNRYPSSWILVFLVLYGVCITDIVHAQNGTQATTDPNEARALNSIFQQWGIKADQTQWNVS  
GELCSGAALGSSPTIDAQNYNPFIKCDCSDNNATTCHITALKVYAIDVVGVIPDELWTLTFLTNL  
KLGQNYLTGTLSPSIGNLTRMQYLDVSINLSGELPKELGLLTDLRSFGFGSNNFSGPLLSEIGNC  
SKLEQIYFDSSGVSGEIPLTYANLRNMVTVWASDNELTGRIPEFIGNWSKLAVLRFEGNSFEGPIP  
SALSNITSLTELRIISGLSNGSSSLAFLKDMKSLTILVLKNNNISDSIPSNIQEYQNLTLQDLFSNNIT  
GQIPDSLFLNLSNLNVFLGNNKLDGPLPSQKVATLQNIQVSYNNLAGSFPSWVNDQNLQVNLV  
ANNFTIDSSNSSGLPSGLNCLQRNFPNCRGSPVYSQFAIKCGPPITSLNGIEYERENETLGPATY  
YVTGTSRWGVS NVGIFTGNNNPQYTASSSSQFTNTLDSELFQTARVSASSLRYYGLGLENGNY  
TVSLQFAETVIEDGNTWRSLGRRIFDVYVQGNRVLKDFDIKKEAGGVSKRAVERSYNAVVSSEN

YLEIHLFWAGKGTCCIPFQGTYPFISATPDFVPTVSNRPPTRKKDRTGLIVGIVVGVGVSF  
LLVFVVFVIRRRKRQSTYDDEELLGIDSKPYTFSYTELKTATEDFSPANKLGEGGFGPVYKGIL  
NDGRVIAVKQLSVASHQGSQFVTEIATISAVQHRNLVKLYGCCIEGYNRLLVYEYLENKSLDQ  
ALFGETSLNLDWPTRYQICLGVARGLAYLHEESRLRIVHRDVKASNILLDSELIPKISDFGLAKL  
YDDKKTHISTRVAGTIGYLAPEYAMRGHLTEKADVFAFGVVVALEVISGRPNSSDSSLEEEKIYLLE  
WAWNLHENNREVELVDSKLSDFSEEDVKRLIGVALLCTQTSPNLRPSMSRVIAMLSGDTEVST  
VTSRPGYLTDWKFDDTSTFMSDDAGKGNDSYSSSQSTSMVADAEHHTKSAAKPLLQEITGE  
GR

>VFLRR-RLK220

XVEALNKIFKQWDIQSVPLWNISGQPCSGTAIDSEFEAPDNNPAIRCDCSYNNGTTCCHIVRLRV  
YNLNKRGVPIEILVFKHLIFLKIDRNYFTGPLPAFIGNLALTLSIAHNAFSGTIPRELGNLKDL  
TLFSIGVNDFSGTLPPELGNLVKLEQMYINSCGLSGEIPSTFANLTRMRILWAFDNPFTGKIPDFIR  
NWTQLTTLRLQGNSFEGPIPSFSNLVSMSSLRISDISNLSSTLDFIKNMKNLTDLNLRNALITGTI  
PPNIEEYQALKILDLSFNNTLGQIPSALFSLRSLESFLGNNSLSGALPNQKSGLLQTIDLSYNHL  
TGSFSPSWVNSNLELNFVANNFVFDNSNISVLPRLNCLQRNFCNRNTPRYANFAIKCGGPEMRT  
SGILFEAENSSLGAASFNVTRSEKWAWSITGMFADRQNPTYVEDTLSQVTSTNTPELYLTSRLSP  
GSIRYYGLGLENGPYTISLFFAETALKHRSSQIWESVGRRVFDIYIQGSLELKDFDISKEAGGVER  
AITKTFNATVSENHLEIHLFWAGKGTCTPIQGGYYPHISALSVPDFIPTVSGIPPGSRQKSRQG  
LIISISISAGVISSILIFAIFYIKRRARKNDEEVLSSGLGPRPYTFSYAQLRMATEDFSPSNQLGEGGY  
GPVYKGTLS DGRKVAVKLLSLASNQKGSEFVTEIATISAVQHRNLVKLYGCCIEGNRRLLVY  
YLENKSLDKALFATCAGKTSLHLDWPTRFDICLTARGLAYLHEESRPRIVHRDVKAX

>VFLRR-RLK248

XVEALNKIFEQWDIQSVPLWNISGKPCSGTAIDSEFEAPDNNPAIRCDCSYNNGTTCCHIVRLRV  
YNLNKRGVPIEILVFKHLIFLKIDRNYFTGPLPAFIGNLALTLSIAHNAFSGTIPRELGNLKDL  
TLFSIGVNDFSGTLPPELGNLVKLEQMYINSCGLSGEIPSTFANLTRMRILWAFDNPFTGKIPDFI  
GNWTQLTTLRLQGNSFEGPIPSFSNLVSMSSLRISDLNVSSTLDFIKNMKNLTDLNLRNALIT  
GTIPNIEEYQALKILDLSFNNTLGQIPSALFSLRSLESFLGNNSLSGALPNQKSGLLQTIDLSYN  
HLTGSFSPSWVNSNLELNFVANNFVFDNSNISVLPRLNCLQRNFCNRNTPRYANFAIKCGGPEM  
RTSGILFEAENSSLGAASFNVTRSEKWAWSITGMFADRQNPTYVEDTLSQVTSTNTPELYLTSRL  
SPGSIRYYGLGLENGPYTISLFFAETALKHRSSQIWESVGRRVFDIYIQGSLELKDFDISKEAGGV  
ERAITKTFNATVSENHLEIHLFWAGKGTCTPIQGGYYPHISALSVPDFIPTVSGIPPGSRQKSR  
QGLIISISISAGVISSILIFAIFYIKRRARKNDEEVLSSGLGPRPYTFSYAQLRMATEDFSPSNQLGEG  
GYGPVYKGTLS DGRKVAVKLLSLASNQKGSEFVTEIATISAVQHRNLVKLYGCCIEGNRRLLVY  
YLENKSLDKALFATCAGKASLHLDWPTRFDICLTARGLAYLHEESRPRIVHRDVKASNILLD  
AELCPKISDFGLAKLYDEKKTHISTRVAGTIGYMAPEYAMRGHLTEKADVFSFGVLALEILSGIP  
NYENNLVEEKIYLLGWAWTLYEKNQSLALVDPSLMGFDENEALRVLRVALLCTQASPTVRPTM  
SRVVAMLAGDIEVSVAITKPSYLSDWDPKDIHCGFSYEDTKTFTKSEICSNKSHESHPIIDLNP  
DLTPSPLNFSEPRLSDLIGKGX

>VFLRR-RLK256

MICEYRLMSLITLPLLLLCKVGVSEFRIVNAVLPPLTGNTGNPYNRRDPSSVACNKAYSRYCLGR  
EYRQKLDCA TDGGLPCYEVYALRAVTRALRLSPMPYISREYCNDGKSEDSITVCNCTEKNGT  
VCHITRISTSSIDLSGGRIHENVSHLTLYLKTLDLSYNHLHCTIPESLGNLKS LVTNLHNNFLNGS  
IPSSFQGLSSKLTSLRNNKLSGPIPKELGSLSNLVTMRLEENELYGHLPELGKLSKLERLDLSS  
NNLTGNLPRTYDKLTSLEIFGVAGNSLNGQIPEFISKWTNLRELYLIGNDFEGHLPLEIFNMSKLD

MLWVSDLRNPGFSFPEHANMTNIENLILRNCNIIGPVPEYIANWIWLLTGNMLDGPPIPLIDND  
MDLSYNNILLPKDAKEGKPHGSGPKPHGPEPNTKPNRNYILEARDKYCQGKSKYYSLFINCGG  
GQTSFEGNQYDEDINETKFYESPGGKWAYS CSGDFLSASADSSDY LKNMTCGVSEQSLHETAR  
LCPTSLTYYGFC LHKGN YTVKLHFAEIVYTKDE DYSSSGKRIFDVYIQGEKKLENFNIKDEAGW  
PNKLHTREFVTHVDENPLVIHFFWAGKGSYNT PQLNGPLVSAISVTPNFTIPEGNKLSTSKIVGI  
AVGSAFAPILLLAFLWKMGWLG NKE LQEVHIKVRKKSFTLQQIIDGTRDFSSKMEIGRGRFGIV  
YKAEMPDQTKLAVKKISPESTQDKLKDELQGEIFFNVKSLEHENLIQLFDGYSSKDLHLLIYEY  
MENGSLDQALFEPKSRIELNWEVRFNICLGLAKALKYLHEENVRKIIHRNIKASNILLDENYTA  
KLTD FGLASFDNEDDPFKTIKAGGARAYFAPEYARGQAITDKADVYSFGVVTLEIFSGRSC TEN  
KSEA QKYLLDDACIFQARGKIDQLVDK KLAN YDRKLV PKILNLAIMCINPTADLRPTMSEVVS  
VLSGGTLEQISKVHTSSENFSGYYLX

>VMLRR-RLK202

MICEYRLMSLITLPLLLL VCKVGSEFRIVNAVLPPLTGNTGNPYNRRDPSSVACNKAYSRYCLGR  
EYRQKLD CATD GGLPCYEVYALRAVTRALRLSPMPYISREYCNDGKSEDSITVGCNCTEKNGT  
VCHITRISTSSIDL SGGRIHENVSHLT YLKTLDLSYNHLHCTIPESLGNL KSLVTLNLHNNFLNGS  
IPSSFQGLSS LKTL SLRNNKLSGPIPKELGSLSNLVTMRLEENELYGHLPPELGKLSKLERLDLSS  
NNLTGNLPRTYDKLTSLEIFGVAGNSLNGQIPEFISKWTNLRELYLIGNDFEGHLPLEIFNMSKLD  
MLWVSDLRNPGFSFPEHANMTNIENLILRNCNIIGPVPEYIANWIWNYILEARDKYCQGKSKY  
YSLFINCGGGQTSFEGNQYDEDINETKFYESPGGKWAYS CSGDFLSASADSSDY LKNMTCGV S  
EQSLHETARLCPTSLTYYGFC LHKGN YTVKLHFAEIVYTKDE DYSSSGKRIFDVYIQGEKKLEN  
FNIKDEAGWPNKLHTREFVTHVDENPLVIHFFWAGKGSYNT PQLNGPLVSAISVTPNFTIPEGN  
KLSTSKIVGIAVGSAFAPILLLAFLWKMGWLG NKE LQEVHIKVRKKSFTLQQIIDGTRDFSSKM  
EIGRGRFGIVYKAEMPDQTKLAVKKISPESTQDKLKDELQGEIFFNVKSLEHENLIQLFDGYSSK  
KDLHLLIYEY MENGSLDQALFEPKSRIELNWEVRFNICLGLAKALKYLHEENVRKIIHRNIKAS  
NILLDENYTA KLTD FGLASFDNEDDPFKTIKAGGARAYFAPEYARGQAITDKADVYSFGVVTLE  
IFSGRSC TENKSEA QKYLLDDACIFQARGKIDQLVDK KLAN YDRKLV PKILNLAIMCINPTADL  
RPTMSEVVS VLSGGTLEQISKVHTSSENFSGYYL

>VMLRR-RLK216

MGNNGSIILIPILIFLLRWQLVSGAGPAGNTYSGDPDGKYGSGNPYSGYPNGQGFGLSGKLQAT  
YCGQNQTLPCA EVNALQAVINGFRLLPTIYISSTYCGYRLTTINCTCYRDDKNFILCHITEIYMSS  
KDLSGYIDPAISGLQFLKILELSNNQLTGSIPASLGNLTNLERLYIINNQLVGSIPESFKNL KSLKIL  
DLSSNYLDGPIPSLRDLQNLNTIGLRFNFLNGPIPASLGNLSSLQILNLYSNILSGPIPDDLGNLTQ  
LQFLALDDNELNGKLPEAFGKLSNITALWLGSNYISGNIPQNYSYLTGLQIFSVAGNDLSGKIPD  
YIAKWKNLTALILLGN NFDGNLPEGIFKLEKLQTLWVSGLTNPGFAPKQEKLT TNLYSLILRNC  
SINGTIPSYIAQWLSLTNLDLSFN NLIGEIPKFSPYLKKIFLTRNKLNGTLPPWIINEHNAPERTND  
VALMDLSNND FANVPSVNHENGTLSDSPNSIIEPRSEYISQKIKECKVKYRSLSINSGGEAVKFG  
KQNYENDTALS NFYLSPQGNWAYS FSGDYISPTINASGYIKNLTCGVSLPEAQLYVNARVAPVS  
LTYYAFCLHQGKYNVELHFAETLYSKKEDHSKVGKRVFDVHIQGKRVLQDFNIKKEAGDANK  
NVMTRFPATVAKNKPLSIEFFWTGRGSLYNPPGQNGPLISAISITRAPRKLSLWEIVVIVAACVLG  
LLILLAFMWRMGWIGERELRKARIELETQDGKKSFTVKEIIDATGNFSPRKKIGKDG RFGIYKA  
ELSNLTVAVKKLFPQSKAVAQIGTEVYAKTFKLEHDNLVQLLATYSRKDLHLLIYEYMDRGSLE  
QALFDPKPSMQLSWKTRY SICLQIAQGLEYLHAKNPPIHRDIKASNILLDGSSKAKISDFGLAK  
LYEEDNPFMFIEEGTRMYMAPEYATHKAVTVGVDVFSFGVLLLEIVTG IKN DENLSKHHDQTI



FLLEKVANLHAMVVKDAKLQYKKVKYAELVDEKLLNSNYSEEEVVTIIDLAMLCTDQMASLRP  
IISDVVSVLEGKEIVENVSKIK

>VMLRR-RLK220

MDFSRNYLNGPIPTKFGGLQNLTFMDLSSNILSGSIPEELGKLTQLYRLILDNNELNGSLPEGLG  
NLTNLGTLRLSSNNLTGSIPQSYFNLTQLEIFRVGGNYLSGGIPDFIADWGNLEELILVGNNFEGN  
IAEGIFNLPKLEKLWVVGLRNPGLTFPKKANMSSLQTLTLRNCSINGTIPSYIAQWLSLTNLDLS  
FNNLIGEIPKFSPYLKKIFLTRNKLNGLTPPWIINEHNAPERTNDVALMDLSNNDFANVPSVNHE  
NGTLDSPNSIIEPRSEYISQKIKECKVKYRSLSSINSGGEAVKFGKQNYENDTALS NFYLSPQGN  
WAYSFSGDYISPTINASGYIKNLTCGVSLPEAQLYVNARVAPVSLTYAFCLHQGKY NVELHFA  
ETLYSKKEDHSKVGKRVFDVHIQGKRVLQDFNIKKEAGDANKNVMTRFPATVAKNKPLSIEFF  
WTGRGSLYNPPGQNGPLISAISITRAPRKLSLWEIVVIVAACVLGLLILLAFMWRMGWIGEREL  
RKARIELETQDGKKSFTVKEIIDATGNFSPRKKIGKDGRFGIHYKAELSNLTVAVKKLFPQSKAVA  
QIGTEVYARTFKLVHDNLVQLLATYSRKDLHLLIYEYMDRGSLEQALFDPKPSMQLSWKTRYSI  
CLQIAQGLEYLHAKNPPIIHRDIKASNILLDGSSKAKISDFGLAKLYEEDNPFMFIEEGGTRMYM  
APEYATHKAVTVGVDFVSFGVLLLEIVTGIKNDENLSKHHDQTIFLLEKVANLHAMVVKDAKLQ  
YKKVKYAELVDEKLLNSNYSEEEVVTIIDLAMLCTDQMASLRPIISDVVSVLEGKEIVENVSKI  
KVESSTV

>VFLRR-RLK233

MNHGKSVQVKNPDGSLVLQYQRRRDFPIDNKKYCYNLGTKERRRYLVRATFQYGSLENEDSY  
PKFDLYLDATKWSTVTVLDASRVYVEEMIIRAPSSSIDVCICCATTGSPFISTIELRPLNLSMYAT  
DYEDGFFLKLAARVNFGAPSEEALRYPDDPYDRIWDSDLVKRQNFLVGVAPGTVRINTTKSIDI  
QTREYPPVKVMQTAVVGEEGMLSYRLNLEDFPANARAYAYFAEIEDLRANETRKFMMQPYIS  
DYSNAVVNIAENANGSYRLYEPSYMNVTLDVLSFSFVKTHDSTQGPLLNAIEISKYLKIASKT  
DSQDVTVLDAFQSMMLAASSLTNEGDPVPAQWDWVNCSSNAPPRITKIALSGKNLKGEIPPEI  
NNMEALEELWLDGNFLTGSLPDISNLVNLKIVHMEKNKLSGSLPKYLGSLPNLRELYIQNNSFT  
GEVPPALLNGKVIINYEDNPGLHKKATKMLHFKLILGISIGILAVLLVLLGSLVYLRSLQRKAS  
HQKTNDQGNSLRNSTKPSTAYSIARGWHLMDGVSYYISFSELEEATNNFSKKIGKGSFGTVY  
YGQMKDGKEIAVKIMADSSSHLRQQFVTEVALLSRIHHRNLVPLIGFCEEEHQRCNPSIIHRDVK  
TSNILLDINMRAKVSDFGLSRQAEEDLTHISSVARGTVGYLDPEYYANQQLTEKSDVYSFGVVL  
LELISGKKPVSTEDFGAEMNIVHWARALIRKGDVVSIVDSIIIGNAKIESIWRIA EVAIQCVQORA  
ISRPKMQEVILAIQEAIKIEKGTDSSQKLSASGSSKAQSSRKTLTTSFLEIESPDLSNGCLVPAAR

>VMLRR-RLK179

MNHGKSVQVKNPDGSLVLQYQRRRDFPIDNKKYCYNLGTKERRRYLVRATFQYGSLENEDSY  
PKFELYLDATKWSTVTVLDASRVYVEEMIIRAPSSSIDVCICCATTGSPFISTIELRPLNLSMYATD  
YEDGFFLKLAARVNFGAPSEEALRYPDDPYDRIWDSDLVKRQNFLVGVAPGTVRINTTKSIDIQ  
TREYPPVKVMQTAVVGEEGMLSYRLNLEDFPANARAYAYFAEIEDLRANETRKFMMQPYISD  
YSNAVVNIAENANGSYRLYEPSYMNVTLDVLSFSFVKTHDSTQGPLLNAIEISKYLKIASKTDS  
QDVTVLDAFQSMMLAASSLTNEGDPVPAQWDWVNCSSNAPPRITKIALSGKNLKGEIPPEIN  
NMEALEELWLDGNFLTGSLPDISNLVNLKIVHMEKNKLSGSLPKYLGSLPNLRELYIQNNSFTG  
EVPPALLNGKVIINYEDNPGLHKKATKMLHFKLILGISIGILAVLLVLLGSLVYLRSLQRKASH  
QKTNDQGNSLRNSTKPSTAYSIARGWHLMDGVSYYISFSELEEATNNFSKKIGKGSFGTVYY  
GQMKDGKEIAVKIMADSSSHLRQQFVTEVALLSRIHHRNLVPLIGFCEEEHQRLVYEYMHNGT  
LRDHIHGLRTIILELSSLF
